# Supplementary material for: Targeting Plasmodium falciparum IspD in the Methyl-d-erythritol Phosphate Pathway: Urea-Based Compounds with Nanomolar Potency on Target and Low-Micromolar Whole-Cell Activity
Source: PubMed Central journal article supplement (PMC11472328; doi:10.1021/acs.jmedchem.4c00212), 2024-09-20

# Targeting *Plasmodium falciparum* IspD in the Methyl-D-Erythritol Phosphate Pathway: Urea-Based Compounds with Nanomolar Potency on Target and Low-Micromolar Whole-cell Activity

Daan Willocx,<sup>†,¶,‡</sup> Lorenzo Bizzarri,<sup>ψ,‡,¶</sup> Alaa Alhayek,<sup>ψ,†</sup> Deepika Kannan,<sup>Σ</sup> Patricia Bravo,<sup>§,||</sup> Boris Illarionov,<sup>⊥</sup> Katharina Rox,<sup>Ⓝ,⊃</sup> Jonas Lohse,<sup>#</sup> Markus Fischer,<sup>⊥</sup> Andreas M. Kany,<sup>†</sup> Hannes Hahne,<sup>#</sup> Matthias Rottmann,<sup>§,||</sup> Matthias Witschel<sup>Ⓝ</sup>, Audrey Odom John,<sup>Σ,‡</sup> Mostafa M. Hamed,<sup>†</sup> Eleonora Diamanti,<sup>†</sup> Anna K. H. Hirsch<sup>\*,†,¶</sup>

<sup>†</sup>Helmholtz Institute for Pharmaceutical Research (HIPS)-Helmholtz Centre for Infection Research (HZI), Campus E8.1, 66123 Saarbrücken, Germany

<sup>¶</sup>Saarland University, Department of Pharmacy, Campus E8.1, 66123 Saarbrücken, Germany

<sup>‡</sup>OmicScouts GmbH, Lise-Meitner-Straße 30, 85354 Freising, Germany

<sup>Σ</sup>Department of Pediatrics, Children's Hospital of Philadelphia, Philadelphia, PA 19104, USA

<sup>§</sup>Swiss Tropical and Public Health Institute, Kreuzstrasse 2, 4123 Allschwil, Switzerland

<sup>⊥</sup>Helmholtz Centre for Infection Research (HZI), Department of Chemical Biology, Inhoffenstraße 7, 38124 Braunschweig, Germany

<sup>⊃</sup>German Center for Infection Research (DZIF), Partner site Hannover-Braunschweig, Inhoffenstraße 7, 38124 Braunschweig, Germany

<sup>||</sup>Universität Basel, Petersplatz 1, 4003 Basel, Switzerland

<sup>⊥</sup>Hamburg School of Food Science, University of Hamburg, Grindelallee 117, 20146 Hamburg, Germany

<sup>Ⓝ</sup>BASF-SE, Carl-Bosch-Strasse 38, 67056 Ludwigshafen, Germany

<sup>‡</sup>Perelman School of Medicine, University of Pennsylvania, Philadelphia, PA 19104, USA

Corresponding Author: Anna.hirsch@helmholtz-hips.de

## Table of Contents

|     |                                                                                                                      |     |
|-----|----------------------------------------------------------------------------------------------------------------------|-----|
| S1. | Activities of selected compounds against auxiliary enzymes.....                                                      | S2  |
| S2. | Calibration curve for CDP-ME.....                                                                                    | S3  |
| S3. | Determination kinetic parameters concerning CTP. ....                                                                | S4  |
| S4. | Determination kinetic parameters concerning MEP.....                                                                 | S5  |
| S5. | LC-MS chromatograms of MEP, 4-methyl-1-oxo-1-(p-tolylamino)pentane-2-sulfonic acid and CDP-ME respectively .....     | S6  |
| S6. | Q1 and Q3 masses for glipizide, <b>10</b> and <b>28</b> .....                                                        | S7  |
| S7. | Supplementary reaction schemes .....                                                                                 | S8  |
| S8. | Activities of representative compounds against different bacterial pathogens.....                                    | S10 |
| S9. | <sup>1</sup> H NMR and <sup>13</sup> C NMR spectra as well as LC-MS and purity traces of Compounds <b>4–40</b> ..... | S11 |

## S1. Activities of selected compounds against auxiliary enzymes

Table S1. Activities of selected compounds against auxiliary enzymes

| #  | Structure, R=                                                                       | <i>PflspD</i> (IC <sub>50</sub> nM) <sup>a</sup> | <i>EclspE</i> (IC <sub>50</sub> μM) <sup>a</sup> | PK-LDH (IC <sub>50</sub> μM) <sup>a</sup> |
|----|-------------------------------------------------------------------------------------|--------------------------------------------------|--------------------------------------------------|-------------------------------------------|
| 7  | 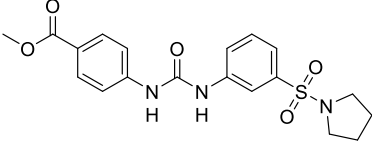   | 170 ± 20                                         | >500                                             | 242 ± 72                                  |
| 9  |    | 330 ± 40                                         | >500                                             | >500                                      |
| 11 |    | 91 ± 19                                          | 73 ± 15                                          | 73±15                                     |
| 26 |    | 225 ± 20                                         | 49 ± 7                                           | >500                                      |
| 27 |  | 600 ± 110                                        | >500                                             | 104 ± 19                                  |
| 31 |  | 400 ± 100                                        | 75 ± 11                                          | >500                                      |

<sup>a</sup>Assays were performed in replicate as independent experiments ( $n = 2$ ); values are shown as mean ± SD.

## S2. Calibration curve for CDP-ME

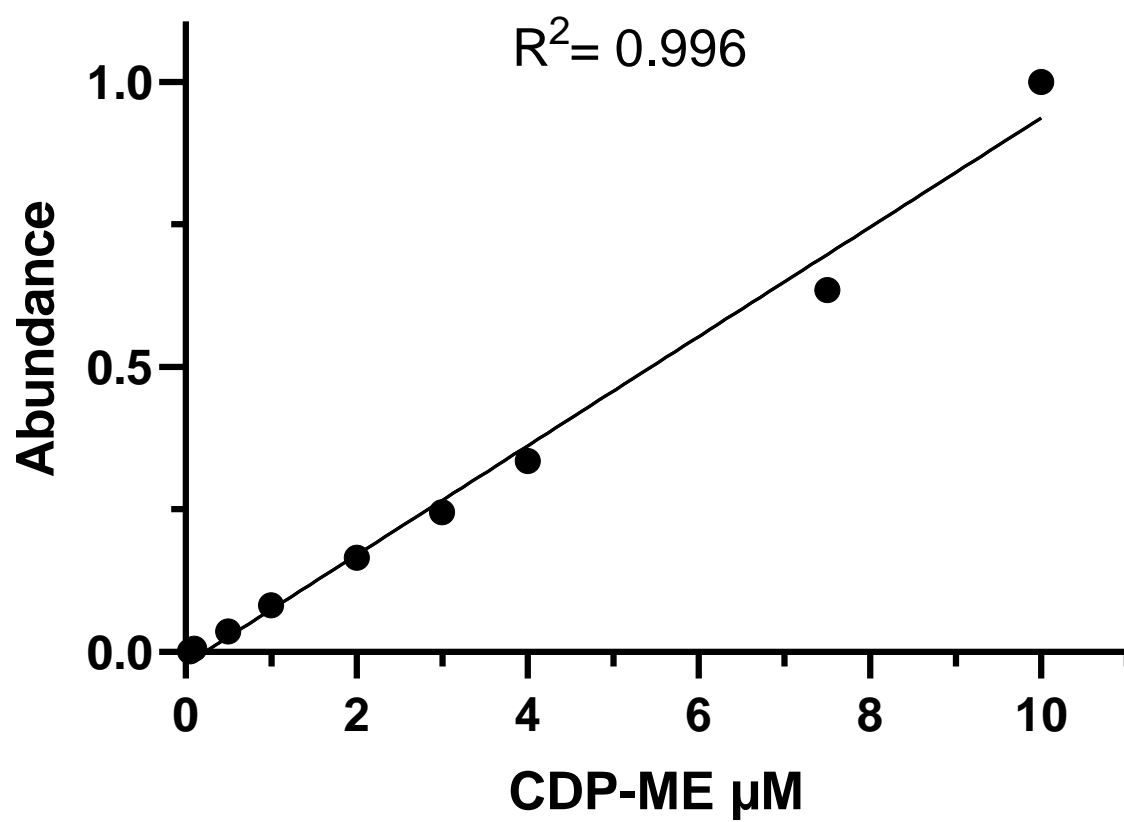

**Figure S1.** Calibration curve for CDP-ME detection. Concentrations ranging from 50 nM to 10 µM. The calculated area under the curve was converted to values ranging for 0 to 1.

### S3. Determination kinetic parameters concerning CTP.

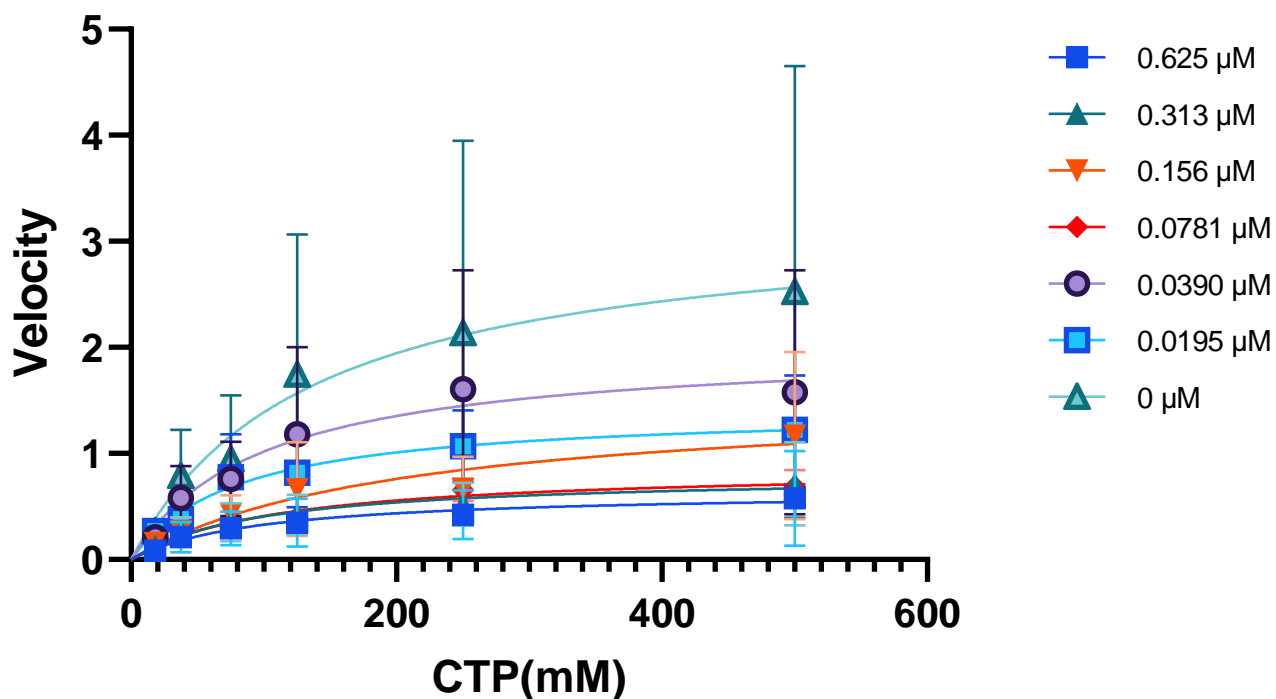

**Figure S2.** Kinetic parameters were determined concerning the CTP substrate. Each data point reflects the mean  $\pm$  SD obtained from a minimum of two-independent experiments.

**Table S2.** Kinetic parameters at different concentrations of compound 10 at varying CTP concentrations.

| Compound 10<br>( $\mu\text{M}$ ) | 0.625  | 0.313  | 0.156 | 0.0781 | 0.0390 | 0.0195 | 0.000 |
|----------------------------------|--------|--------|-------|--------|--------|--------|-------|
| $V_{\text{max}}$                 | 0.6496 | 0.8006 | 1.537 | 0.8674 | 2.021  | 1.418  | 3.253 |
| $K_m$                            | 97.89  | 97.23  | 204.4 | 111.7  | 98.52  | 80.79  | 134.4 |

#### S4. Determination kinetic parameters concerning MEP.

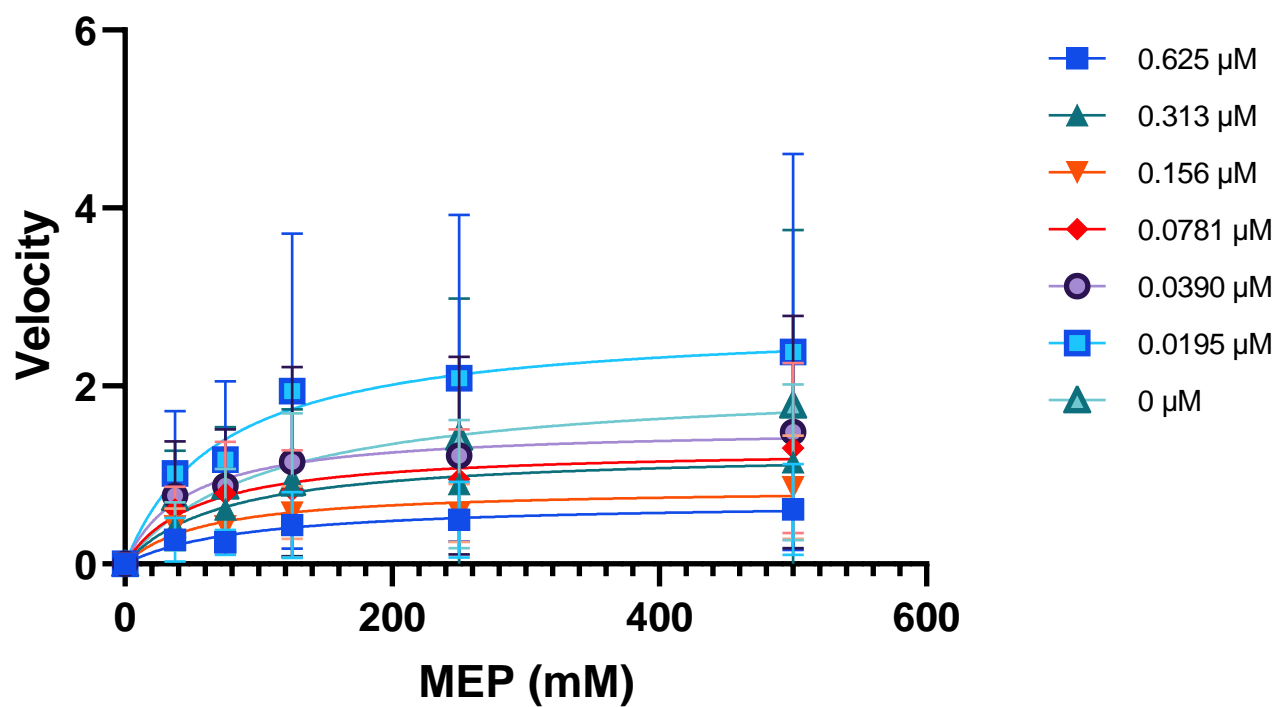

**Figure S3.** Kinetic parameters were determined concerning the CTP substrate. Each data point reflects the mean  $\pm$  SD obtained from a minimum of two-independent experiments.

**Table S3.** Kinetic parameters at different concentrations of compound 10 at varying MEP concentrations

| Compound 10<br>( $\mu\text{M}$ ) | 0.625  | 0.313 | 0.156  | 0.0781 | 0.0390 | 0.0195 | 0.000 |
|----------------------------------|--------|-------|--------|--------|--------|--------|-------|
| $V_{\text{max}}$                 | 0.7037 | 1.277 | 0.8556 | 1.305  | 1.541  | 2.734  | 2.064 |
| $K_m$                            | 90.58  | 74.61 | 59.79  | 53.57  | 46.05  | 71.50  | 106.2 |

## S5. LC-MS chromatograms of MEP, 4-methyl-1-oxo-1-(p-tolylamino)pentane-2-sulfonic acid and CDP-ME respectively

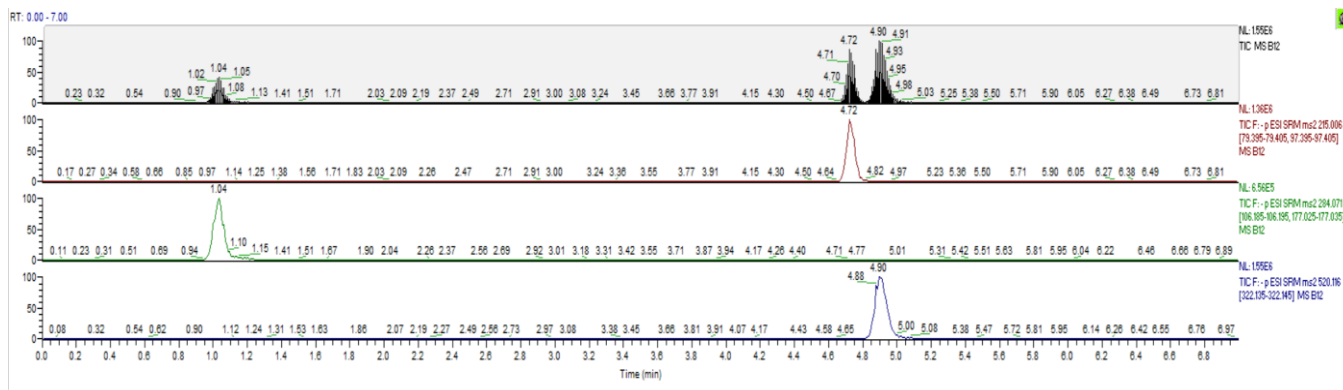

**Figure S4.** LC-MS chromatogram of MEP (second, red), 4-methyl-1-oxo-1-(p-tolylamino)pentane-2-sulfonic acid (third, green) and CDP-ME (fourth, blue) respectively.

## S6. Q1 and Q3 masses for glipizide, 10 and 28

Table S4. Q1 and Q3 masses for glipizide, 10 and 28

| ID               | Q1 Mass<br>[Da] | Q3 Mass<br>[Da] | time<br>[msec] | CE<br>[volts] | CXP<br>[volts] | DP<br>[volts] |
|------------------|-----------------|-----------------|----------------|---------------|----------------|---------------|
| <b>10</b>        | 371.022         | 355.0           | 30             | 15            | 20             | 101           |
|                  | 371.022         | 253.0           | 30             | 25            | 28             | 101           |
| <b>10</b>        | 392.998         | 23.2            | 30             | 69            | 10             | 96            |
|                  |                 | 353.9           | 30             | 13            | 20             | 96            |
|                  |                 | 252.2           | 30             | 19            | 22             | 96            |
| <b>28</b>        | 395.952         | 136.9           | 30             | -16           | -11            | -40           |
|                  |                 | 231.9           | 30             | -34           | -21            | -40           |
| <hr/>            |                 |                 |                |               |                |               |
| <b>glipizide</b> | 443.936         | 319.100         | 150            | -26           | -21            | -66           |
| <b>glipizide</b> | 443.936         | 170.100         | 150            | -40           | -7             | -66           |

## S7. Supplementary reaction schemes

Scheme S1. Synthetic route for the synthesis of 29

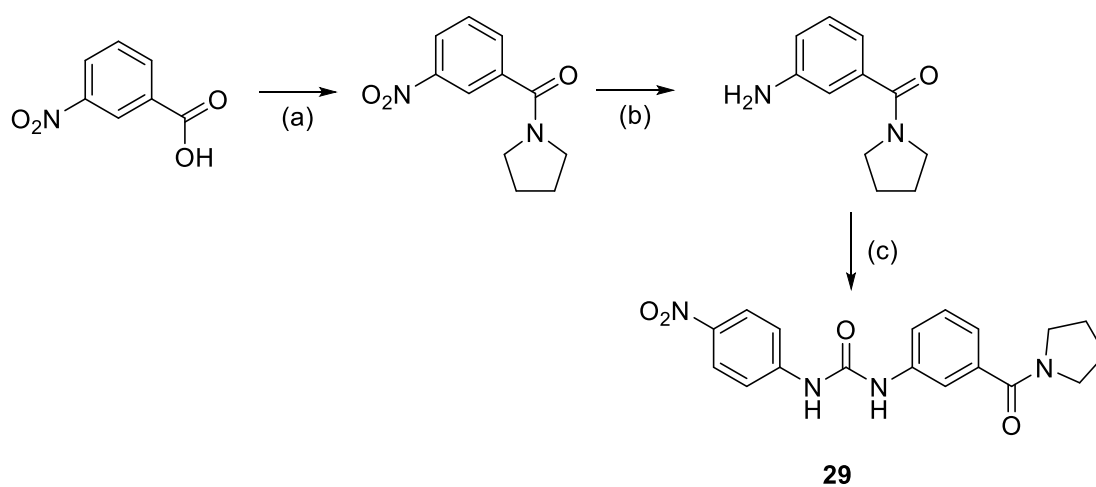

<sup>a</sup>Reagents and conditions: (a) pyrrolidine, trimethylamine, propanephosphonic acid anhydride, room temperature, 2 h; (b)  $\text{NH}_4\text{Cl}$  (166 mM in water), Fe powder, 80 °C, 2,5 h; (c) 1-isocyanato-4-nitrobenzene, room temperature, 1 h, 9% yield over all steps.

Scheme S2. Synthetic route for the synthesis of 30

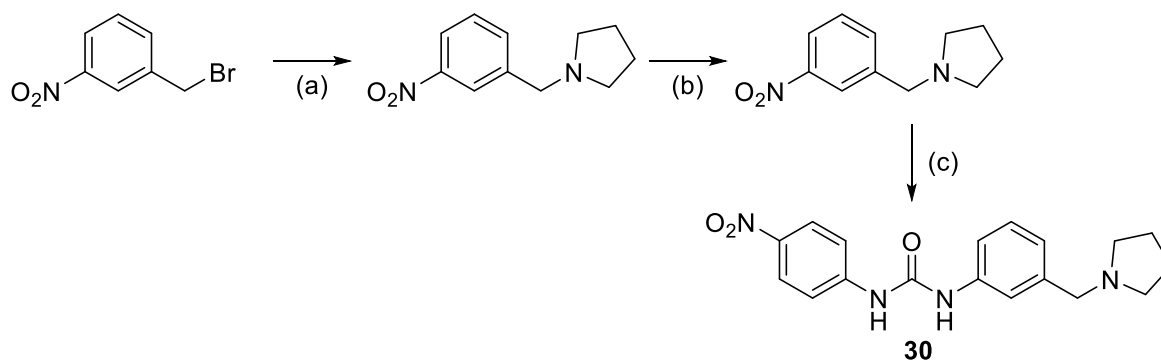

<sup>a</sup>Reagents and conditions: (a) pyrrolidine, trimethylamine, room temperature, 2 h; (b)  $\text{NH}_4\text{Cl}$  (166 mM in water), Fe powder, 80 °C, 2,5 h; (c) 1-isocyanato-4-nitrobenzene, room temperature, 1 h, 9% yield over all steps.



**Scheme S3. General reaction scheme for the synthesis of compounds 31–33<sup>a</sup>.**

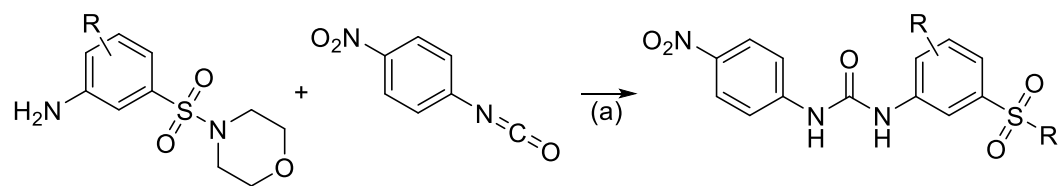

<sup>a</sup>Reagents and reactions conditions: 1-isocyanato-4-nitrobenzene, DMF, room temperature, overnight. 7–23% yield.

## S8. Activities of representative compounds against different bacterial pathogens

**Table S5** Activities of representative compounds against different bacterial pathogens

| #                                                                       | 5               | 8           | 10              | 28            |
|-------------------------------------------------------------------------|-----------------|-------------|-----------------|---------------|
| Inhibition of <i>E. coli</i> K12 growth (at 100 $\mu$ M)                | 45 $\pm$ 6%     | 14 $\pm$ 5% | 46 $\pm$ 4%     | No inhibition |
| Inhibition of <i>E. coli</i> <i>acrB</i> growth (at 100 $\mu$ M)        | Full inhibition | 71 $\pm$ 6% | Full inhibition | No inhibition |
| MIC 90 (growth inhibition) of <i>Mtb</i> H37Rv <i>mCherry</i> 10 strain | n.a             | n.d         | 64 $\mu$ M      | n.d           |

<sup>a</sup>Assays were performed in replicate as independent experiments ( $n \geq 2$ ); values are shown as mean  $\pm$  SD. values are shown as mean  $\pm$  SD. n.a. indicates the absence of activity

# S9. $^1\text{H}$ NMR and $^{13}\text{C}$ NMR spectra as well as LC-MS and purity traces of Compounds 4–40

4

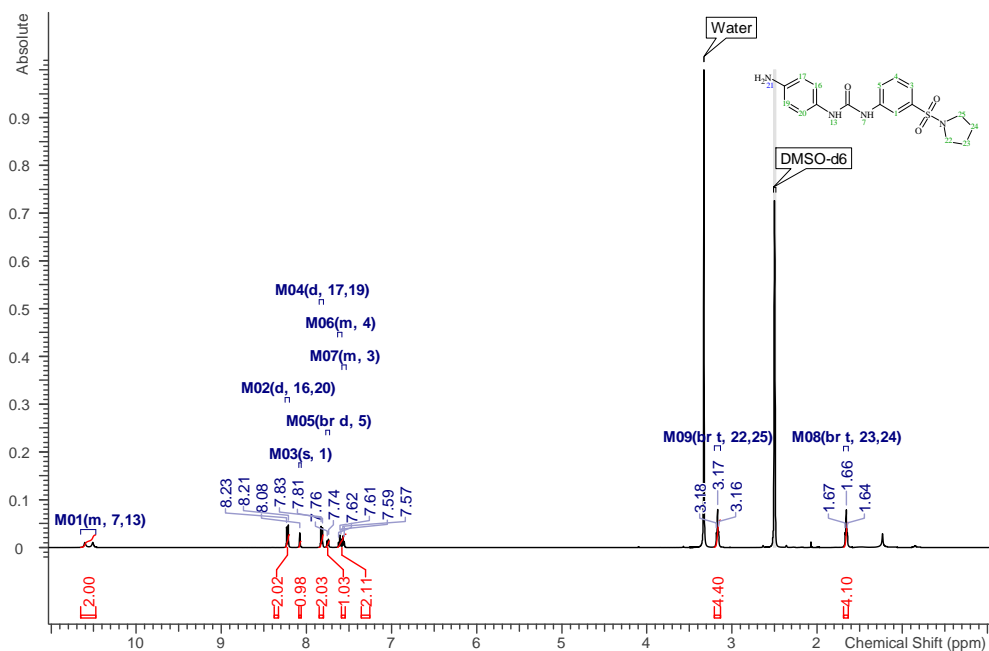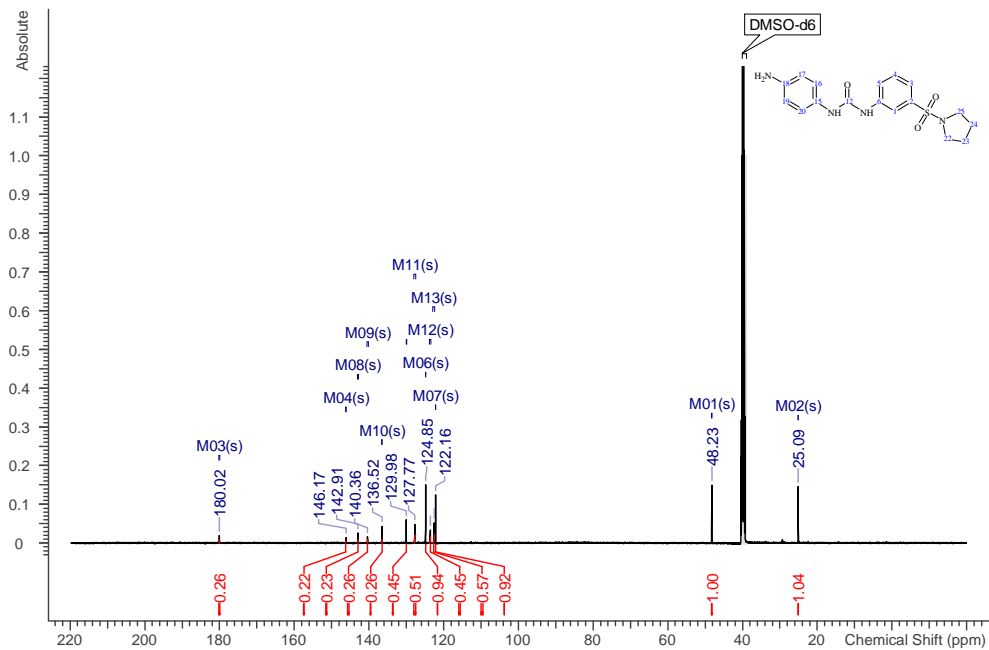

5

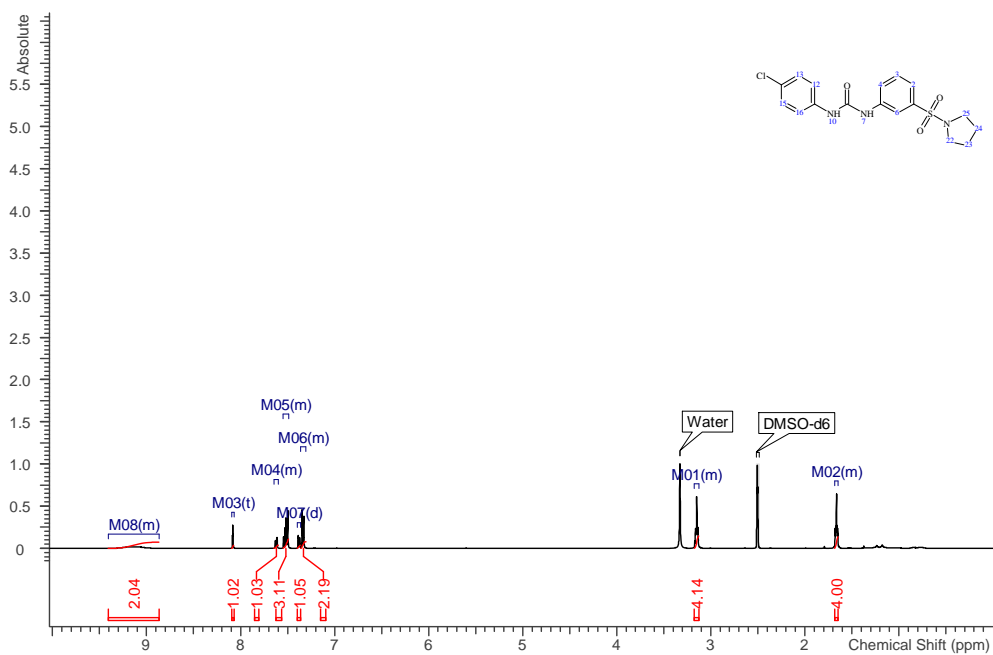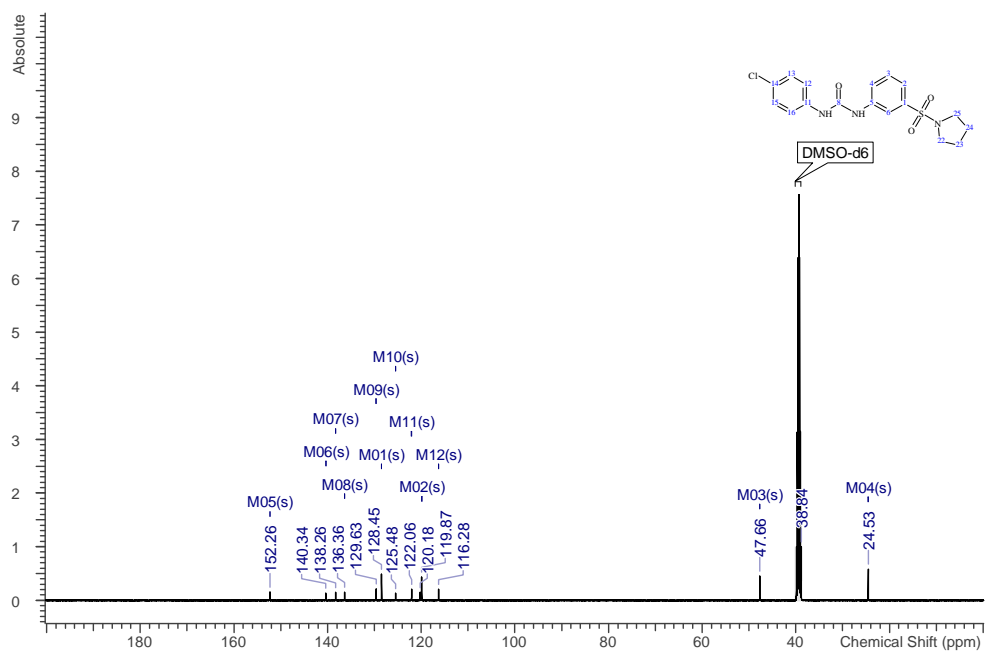

6

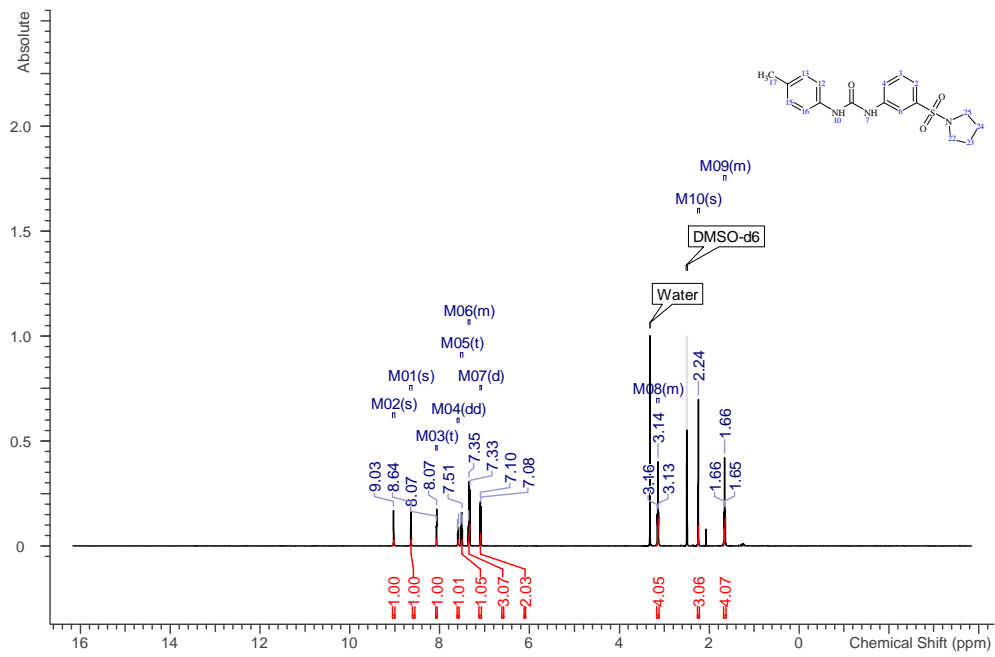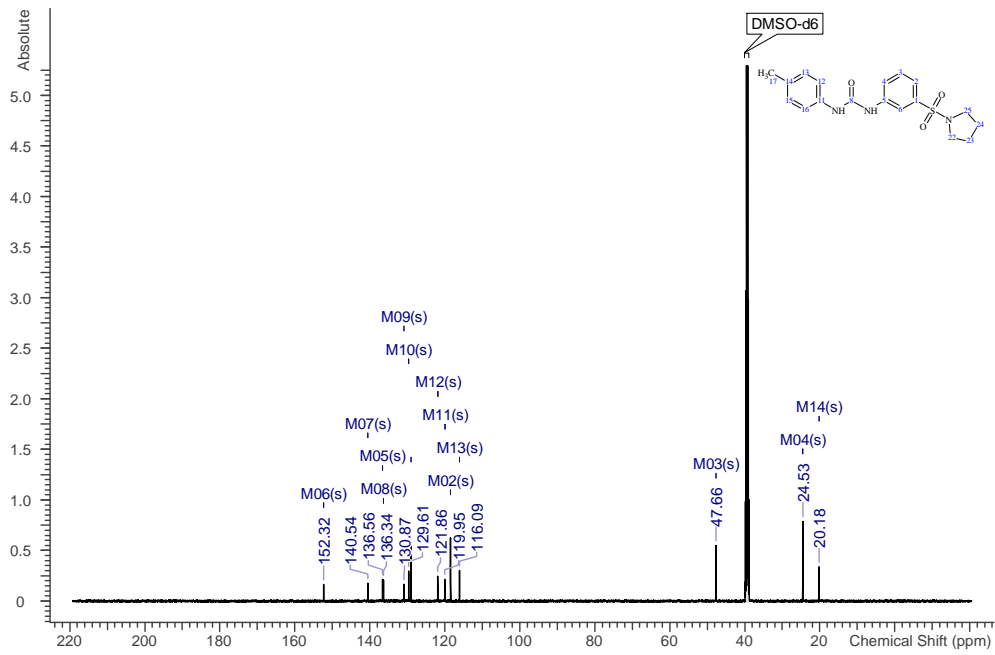

7

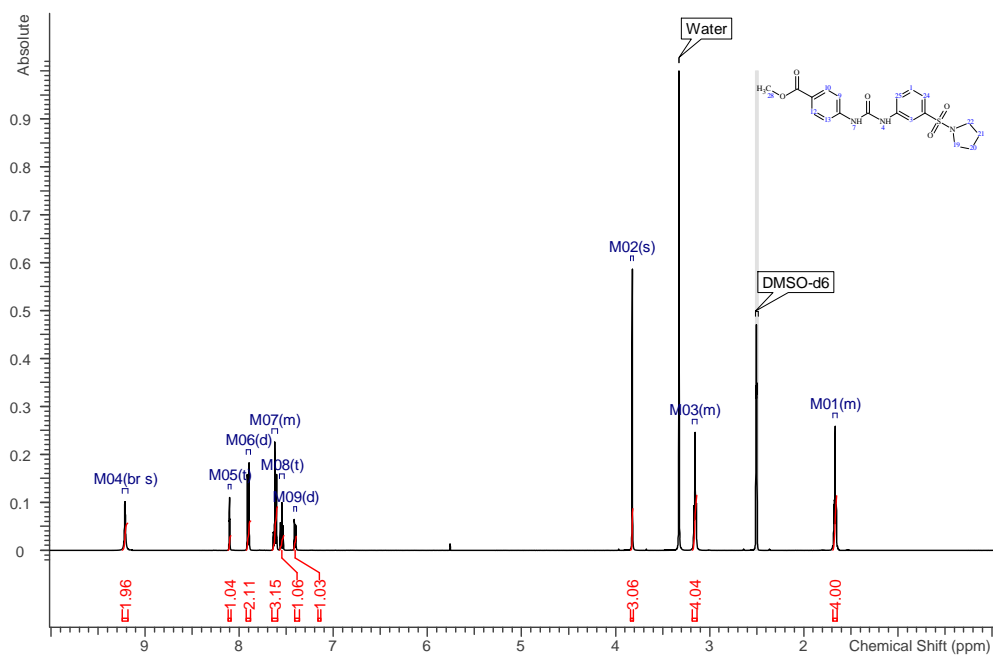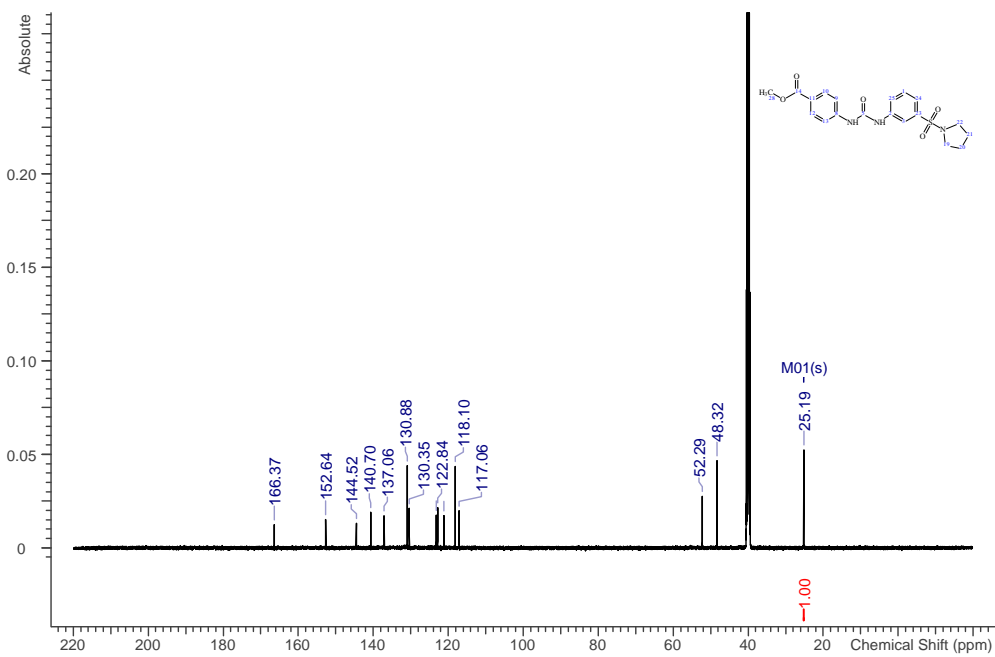

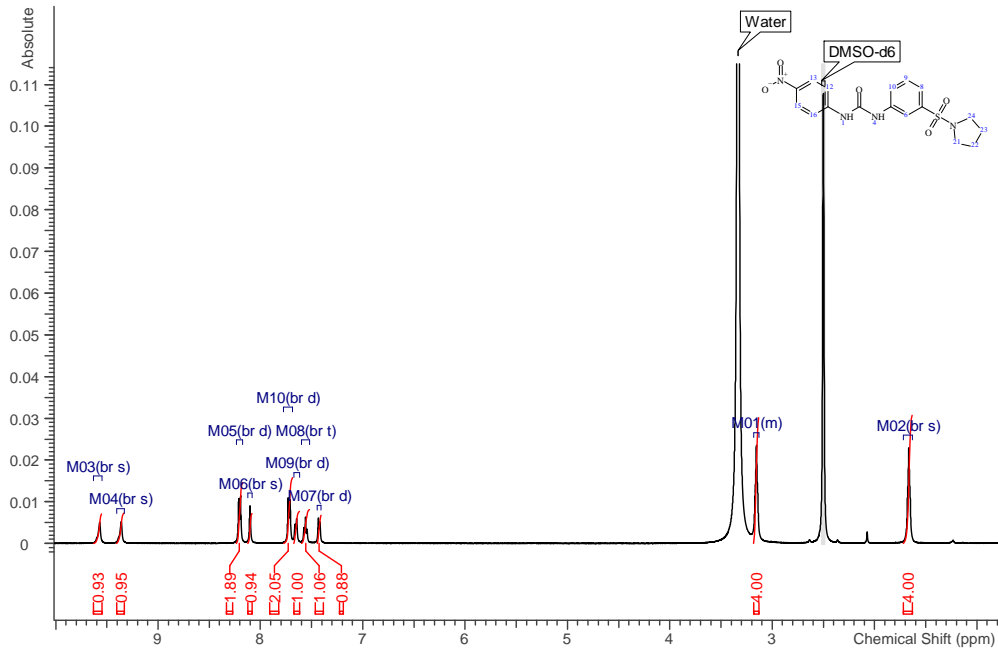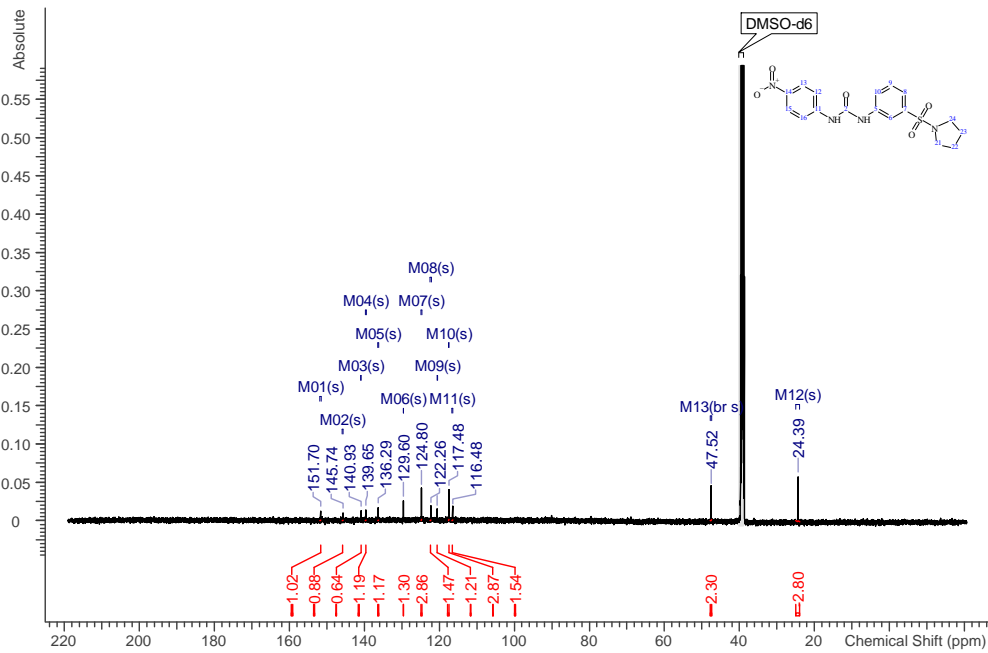

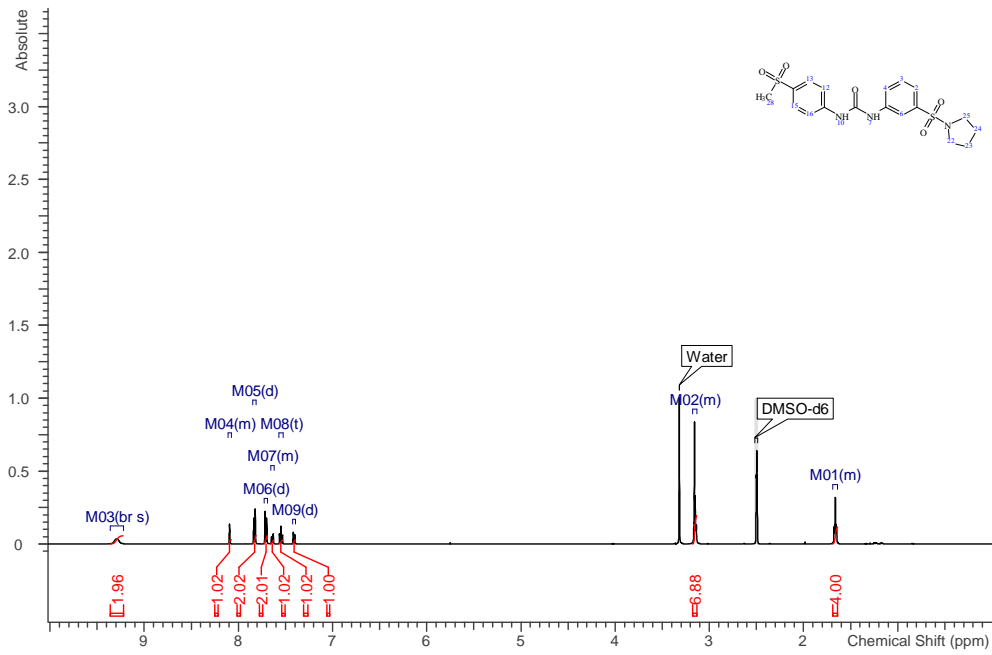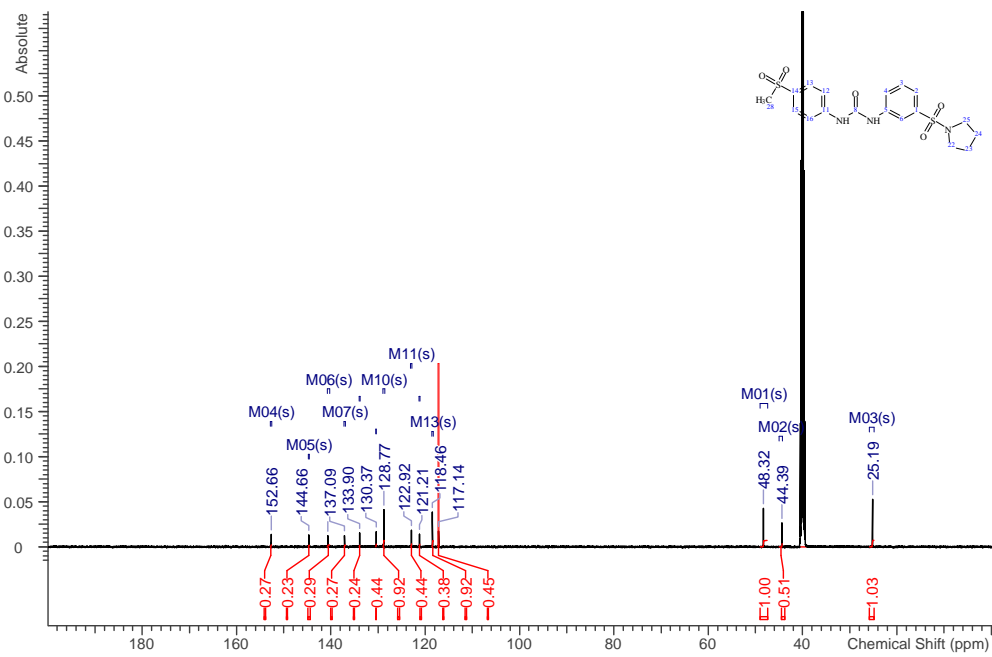



10

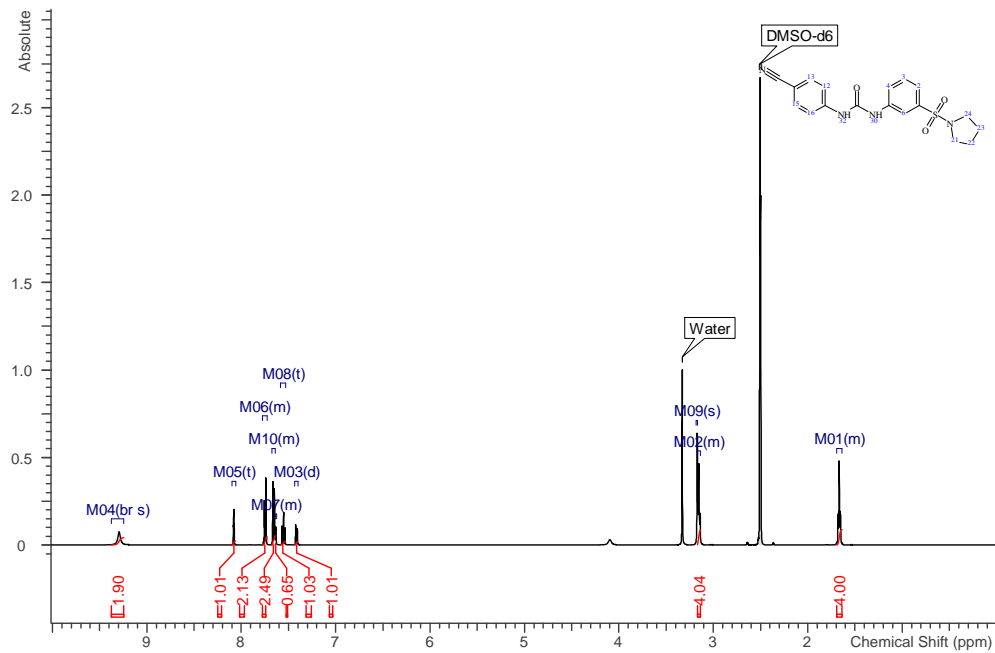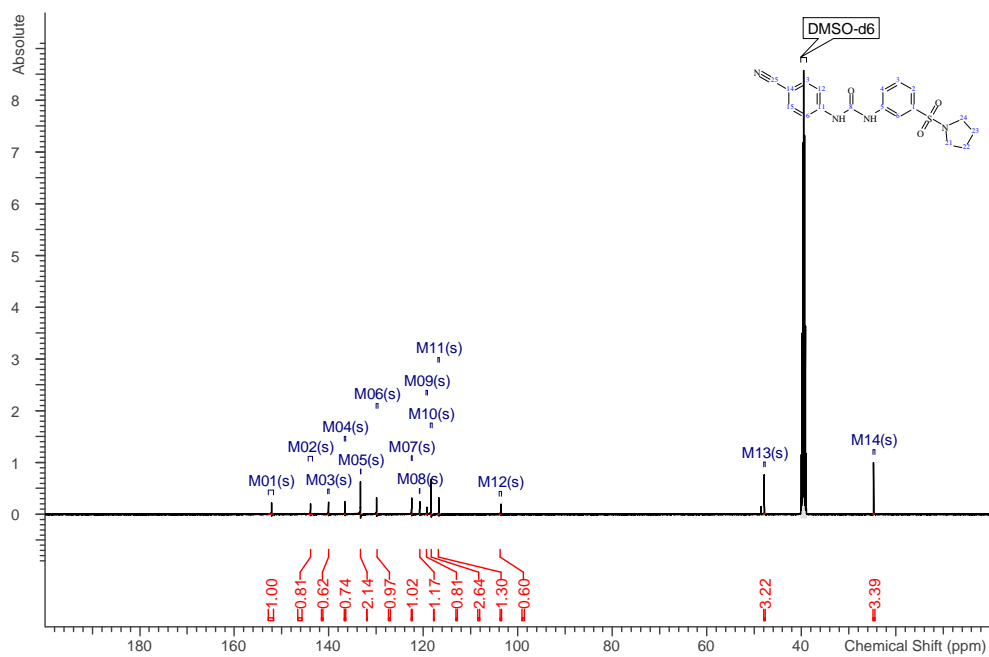

11

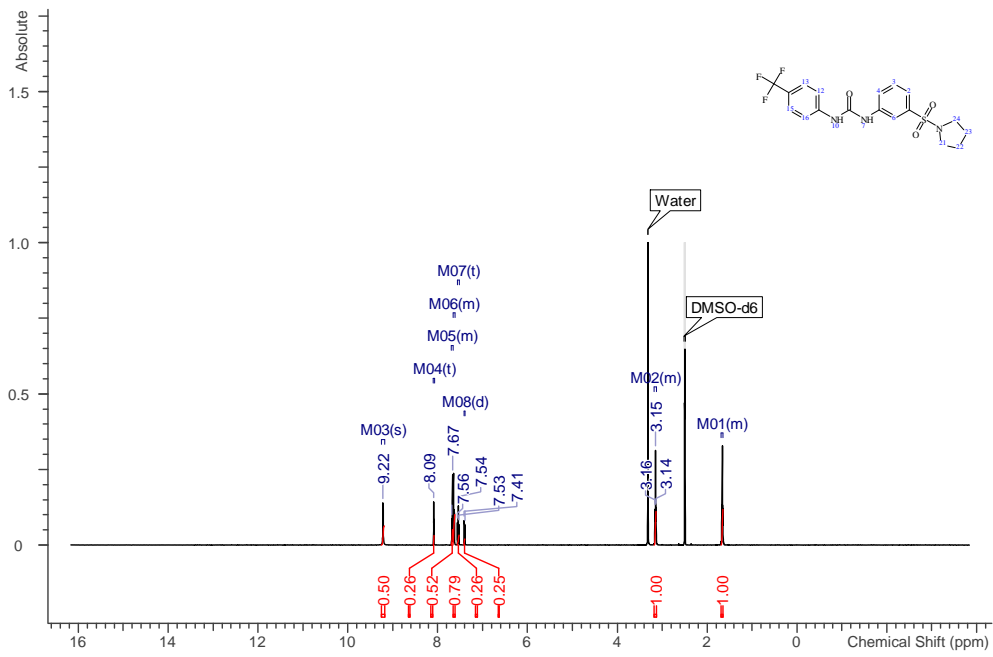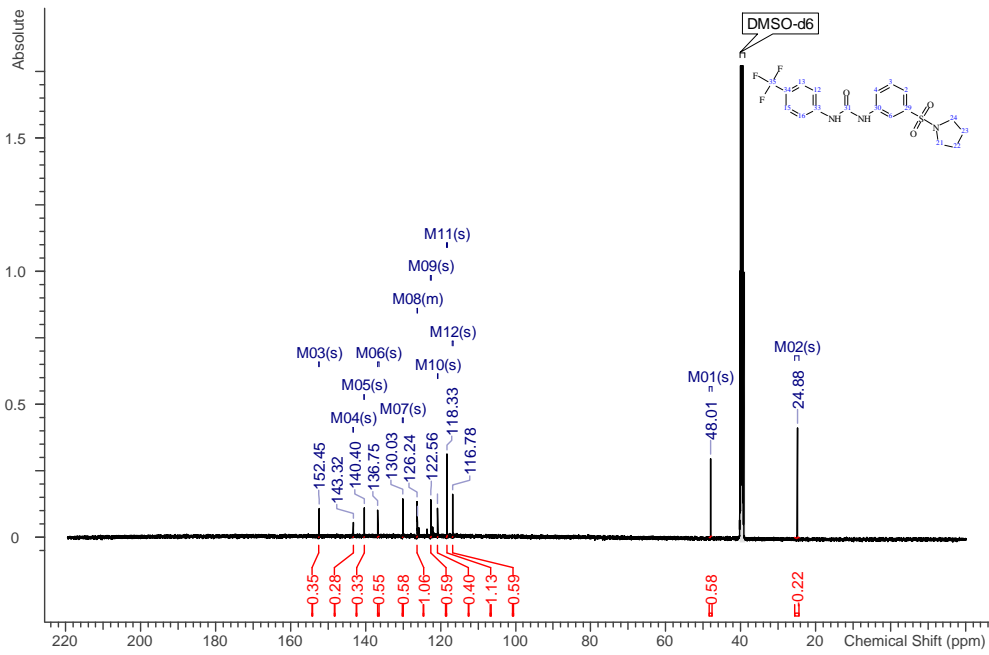

12

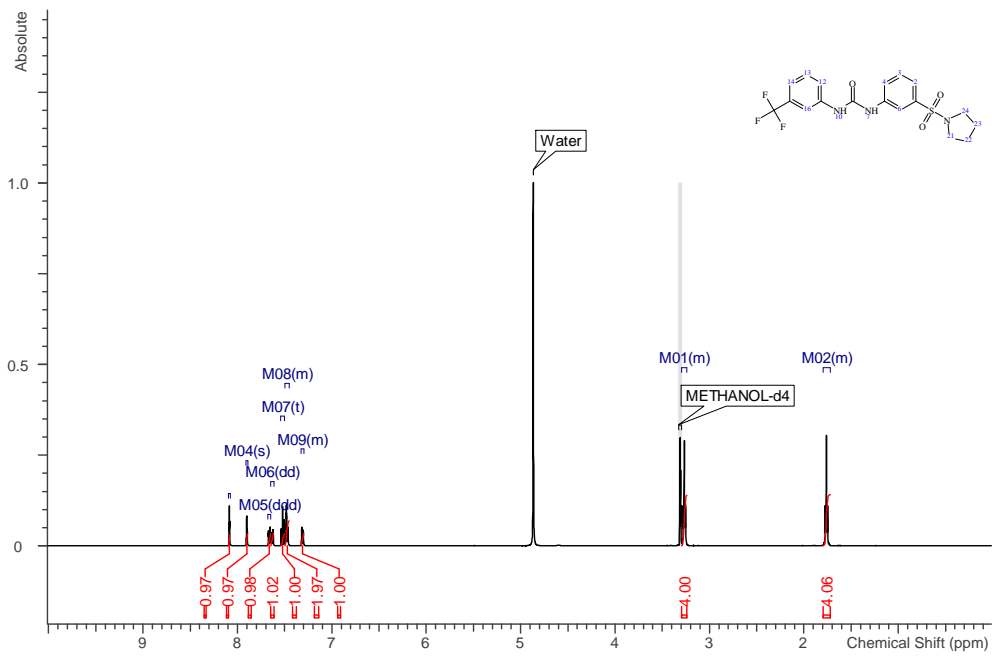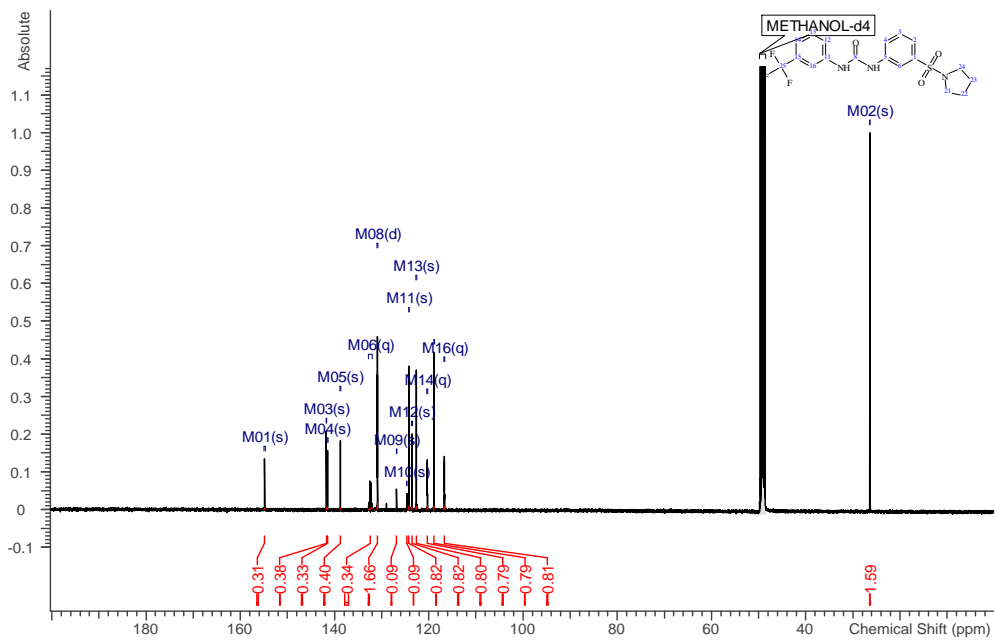

13

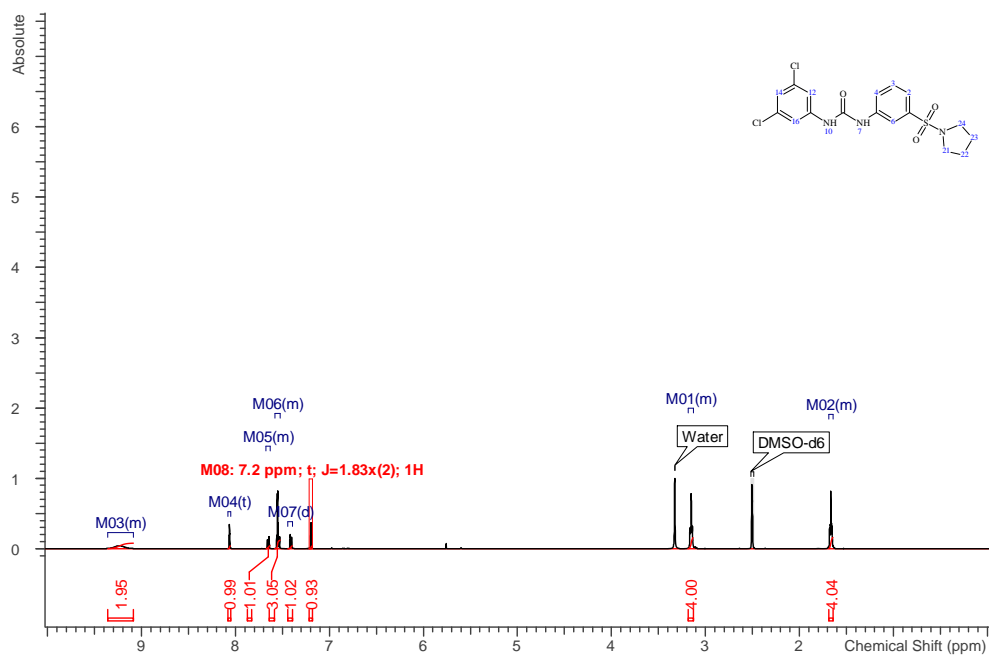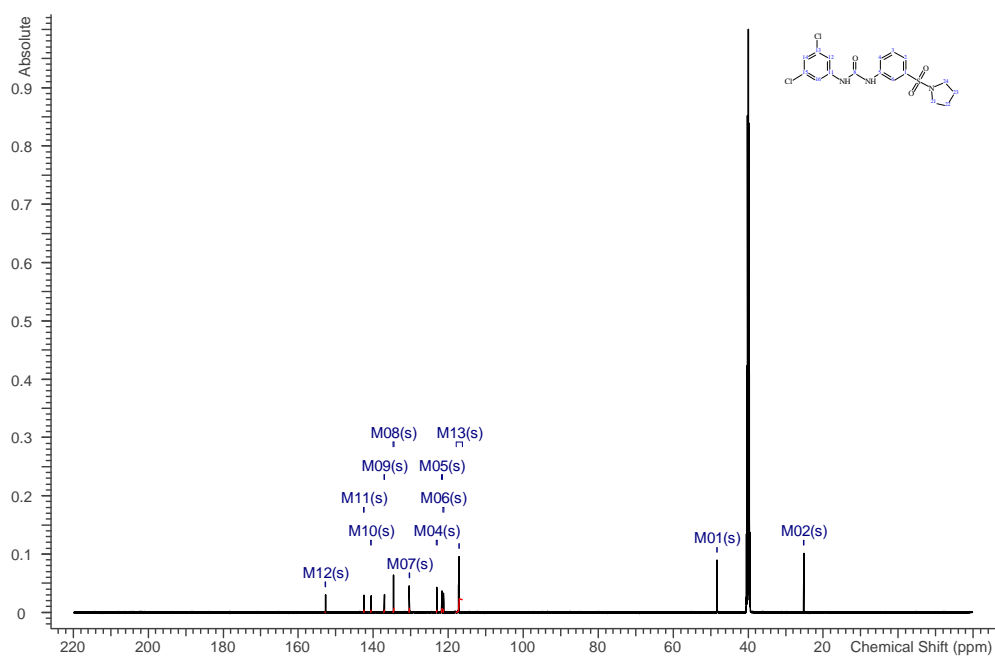

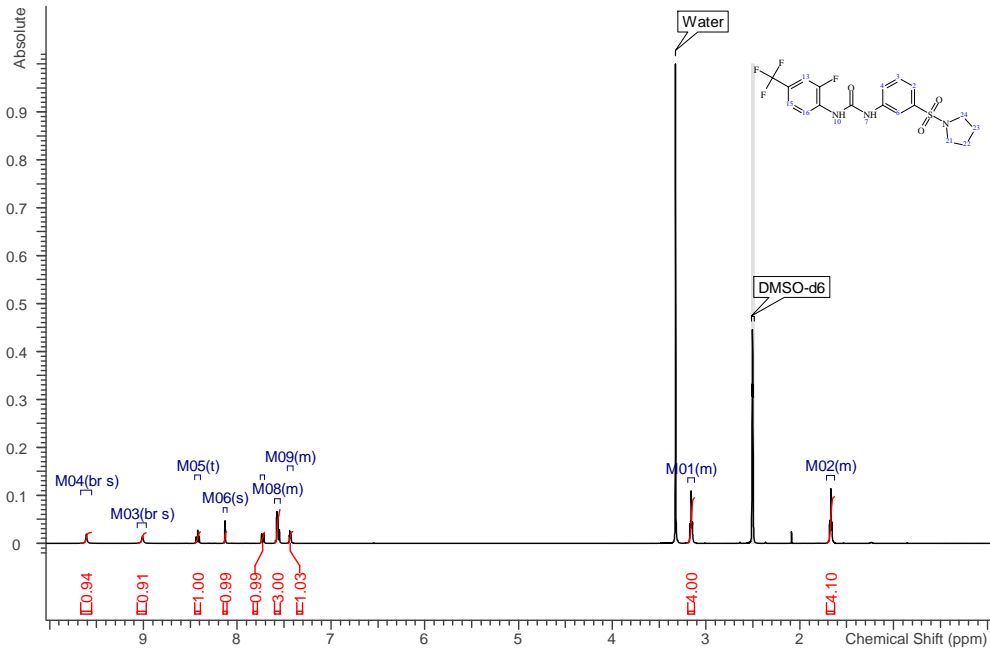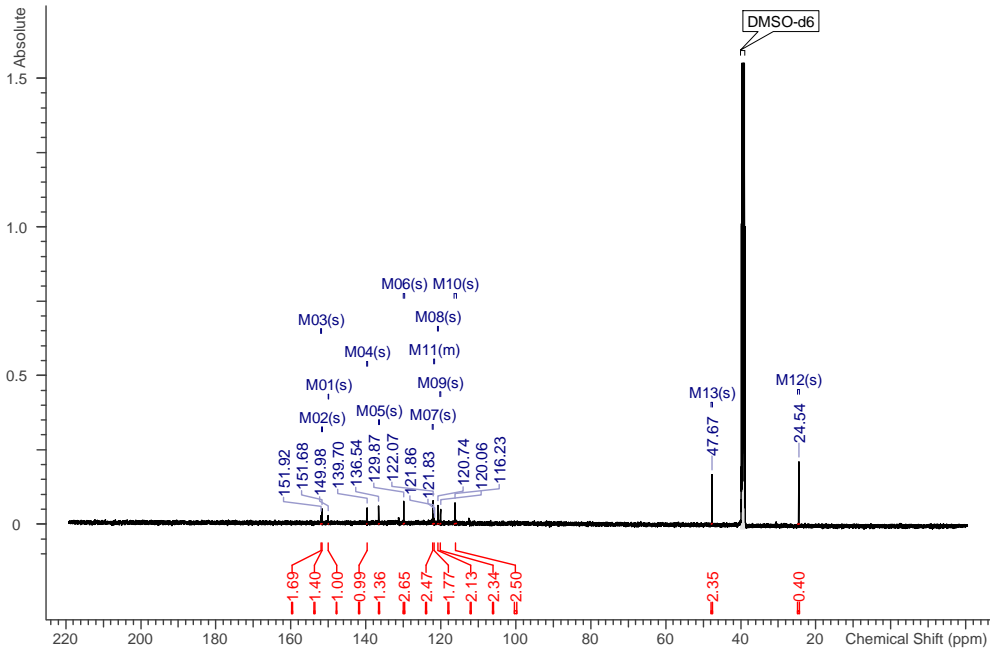

15

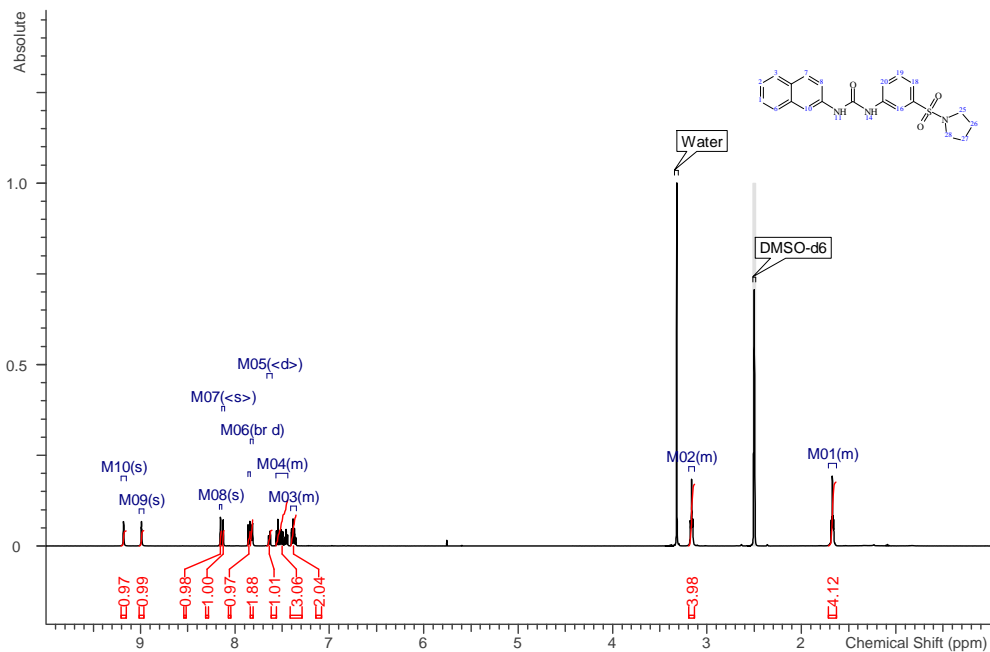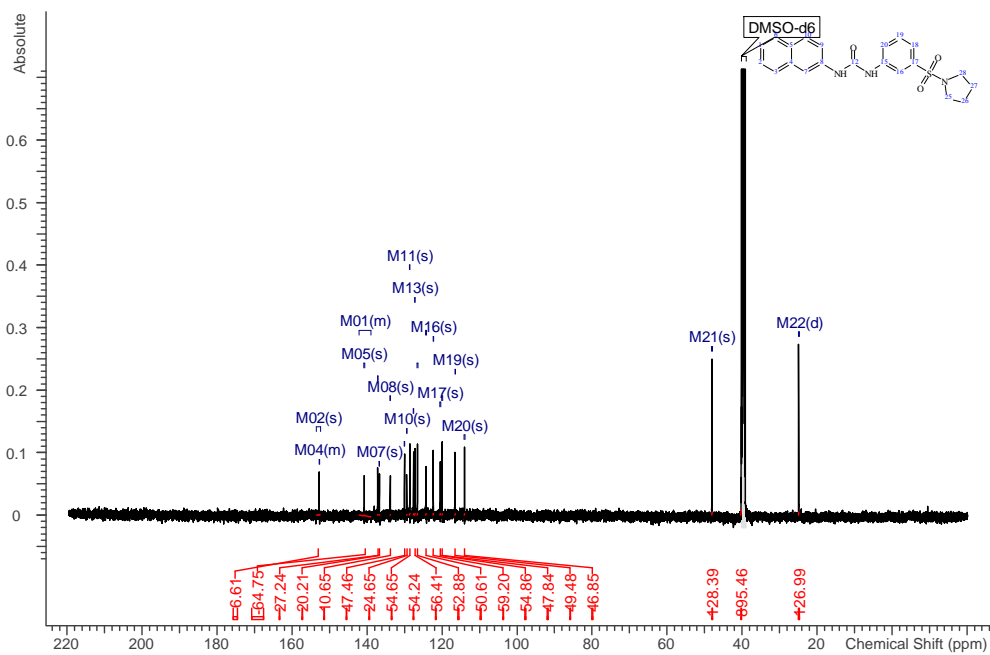

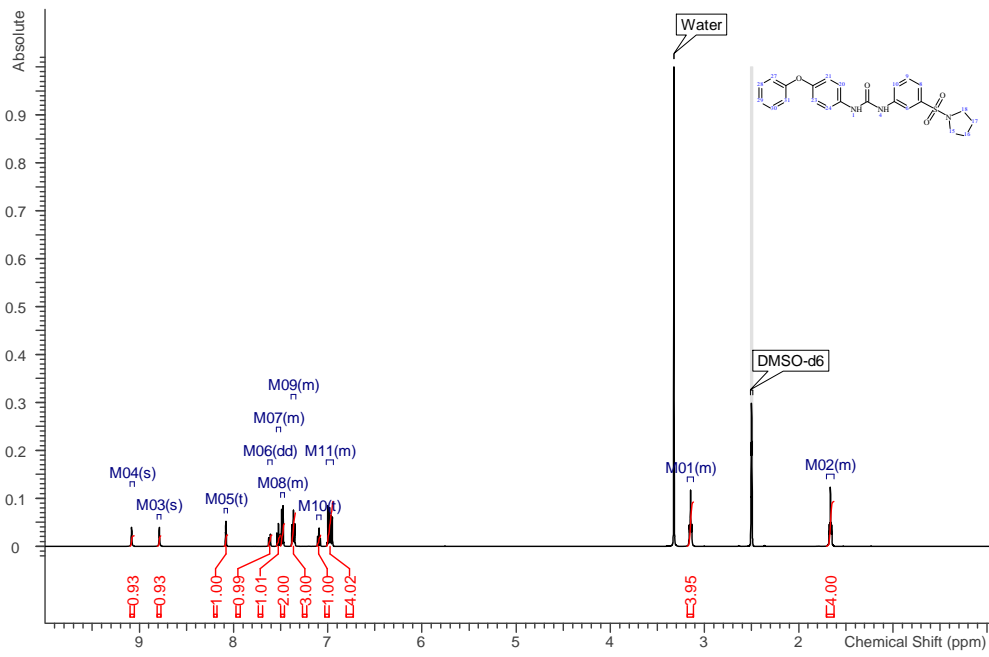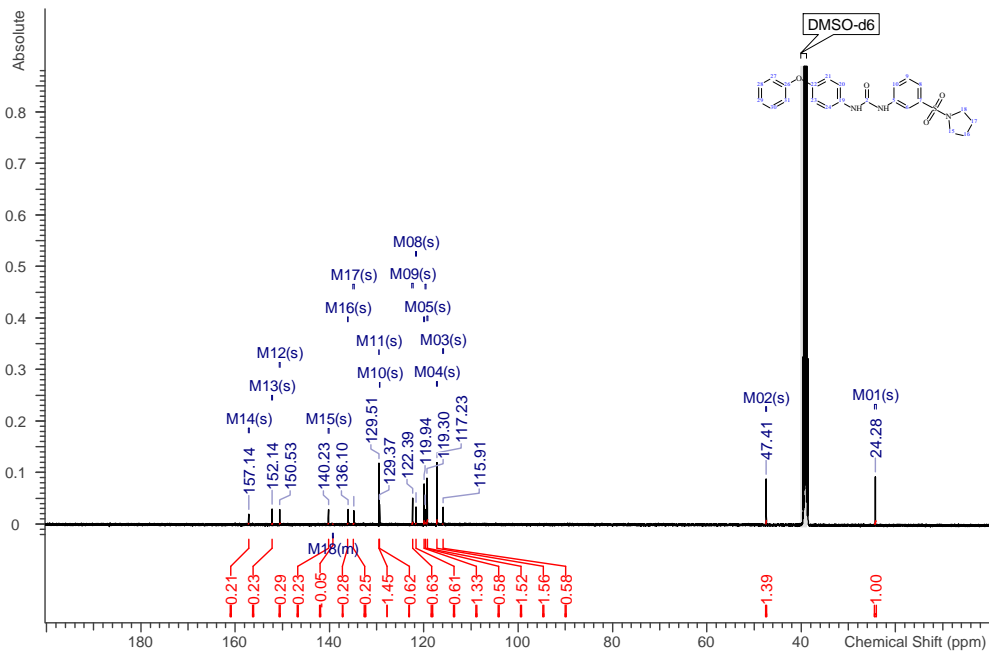

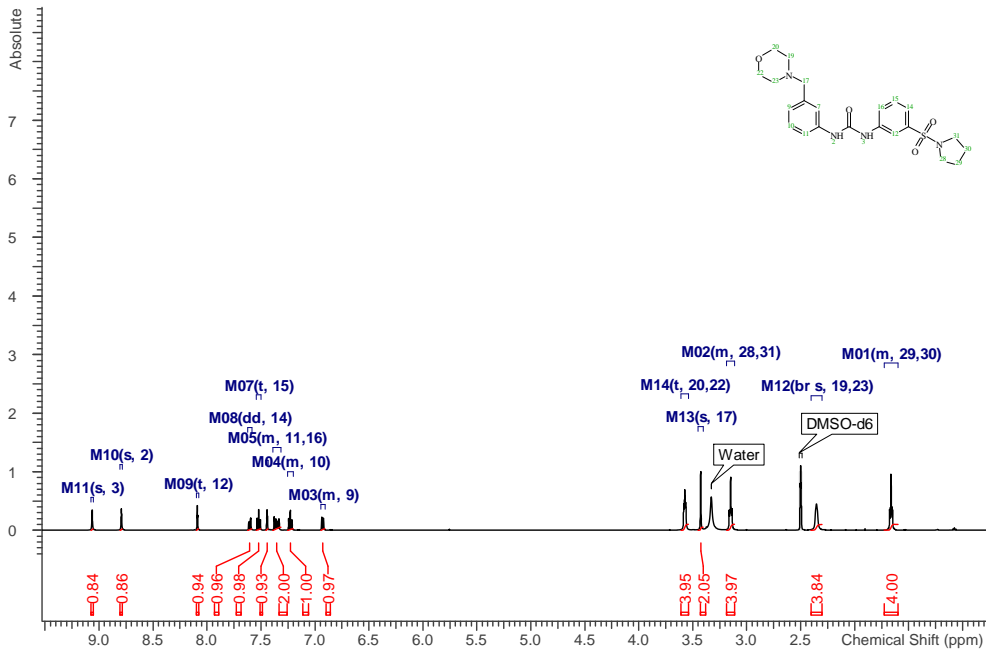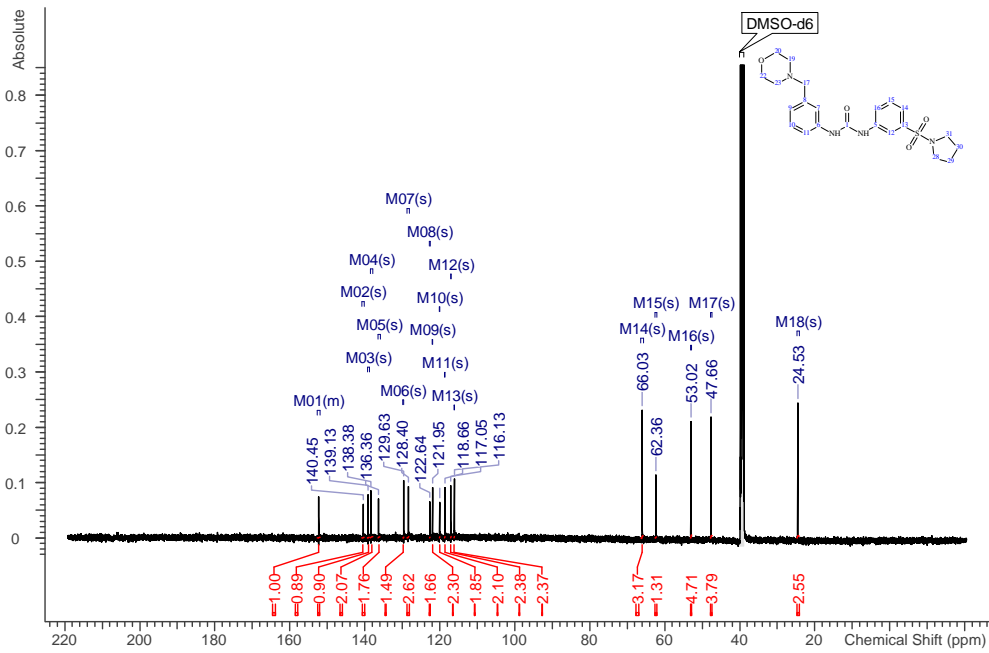



18

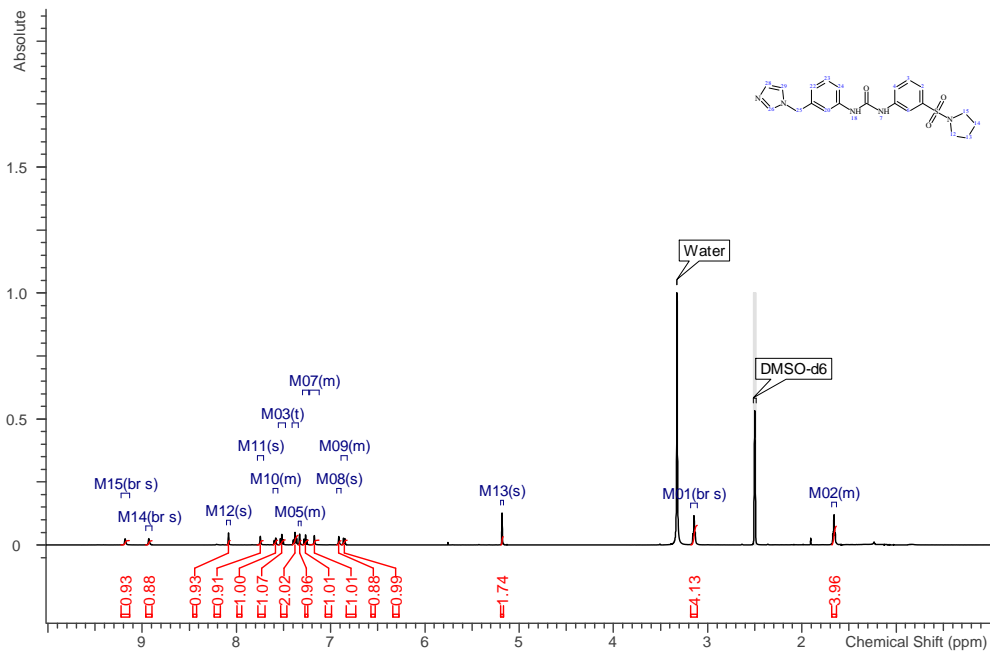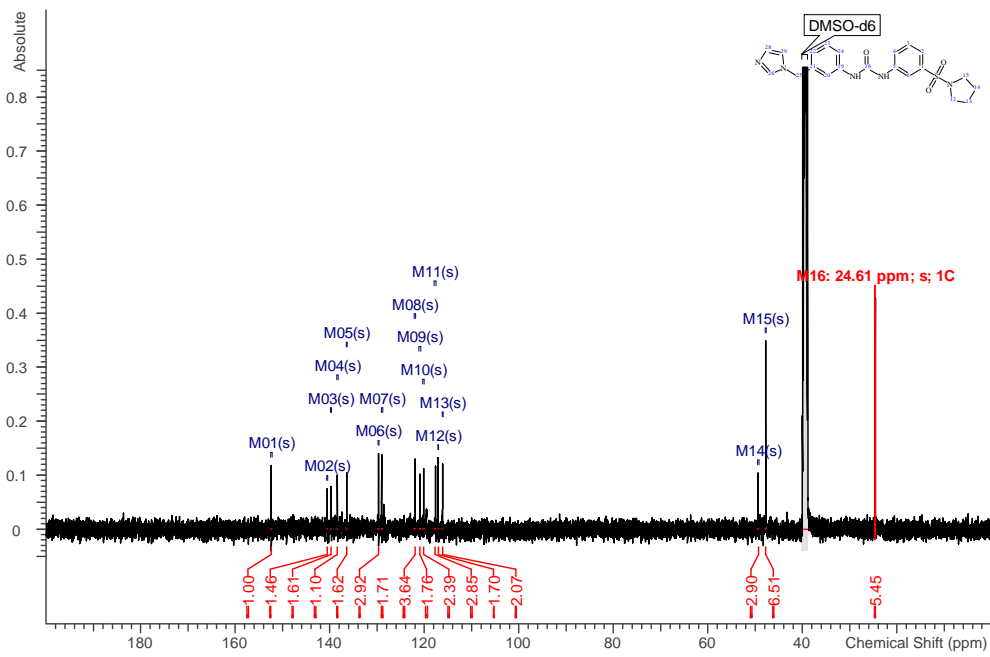

21

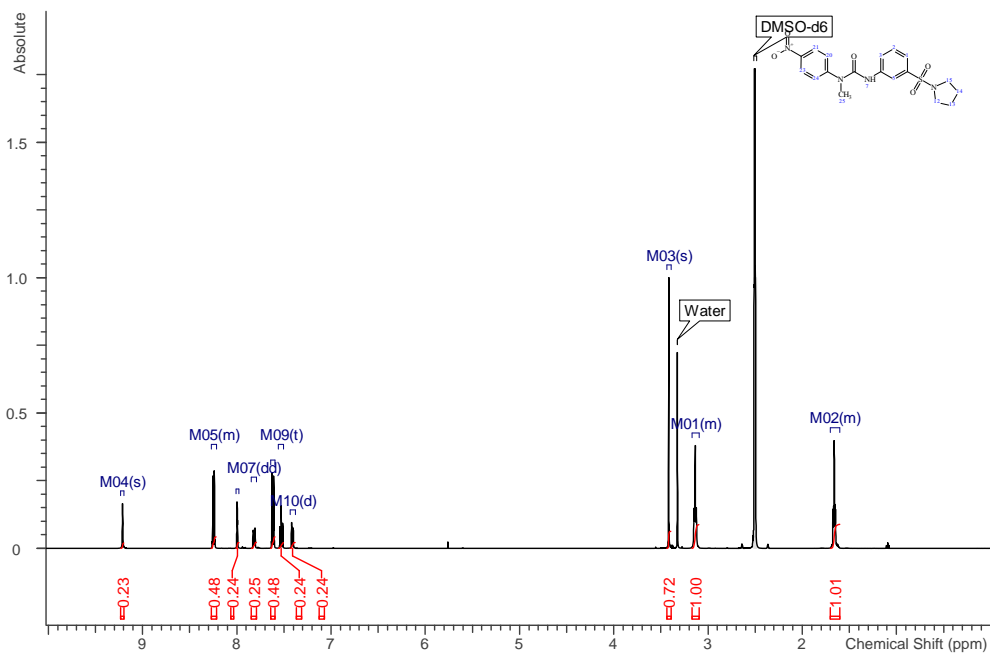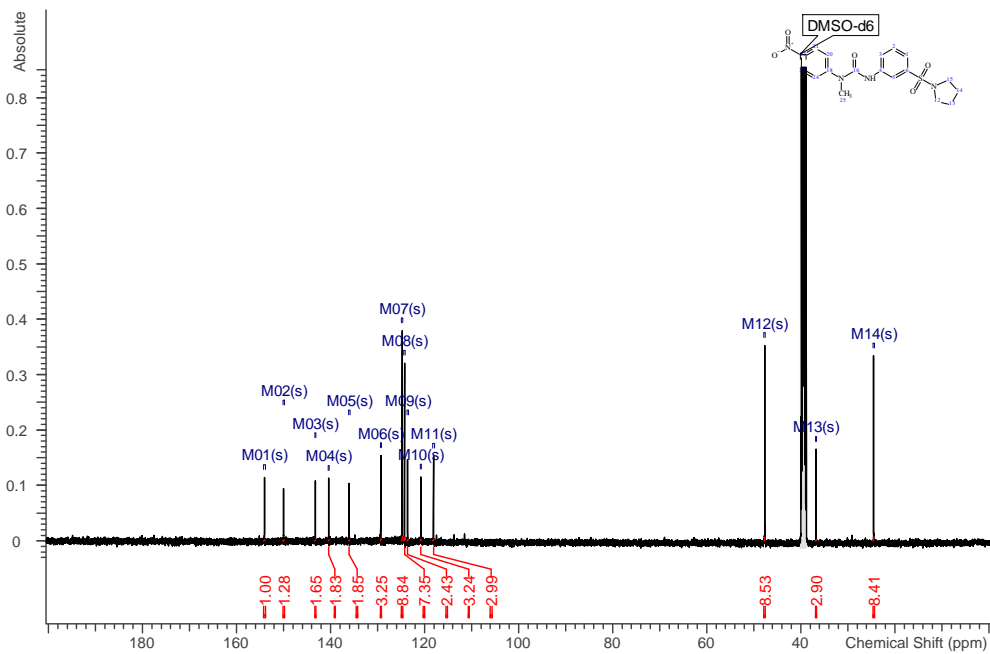

21

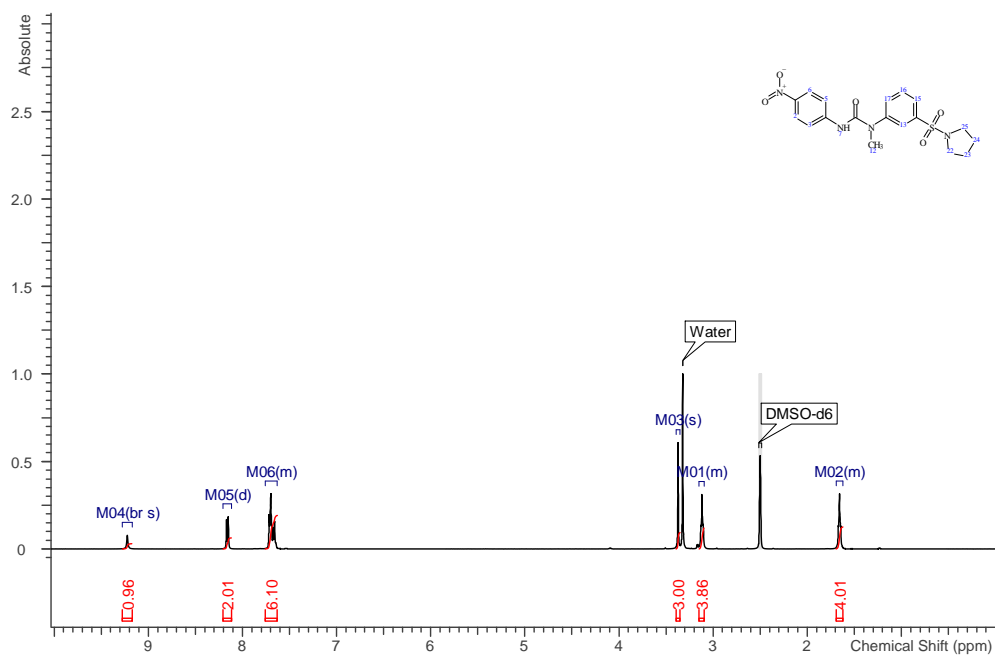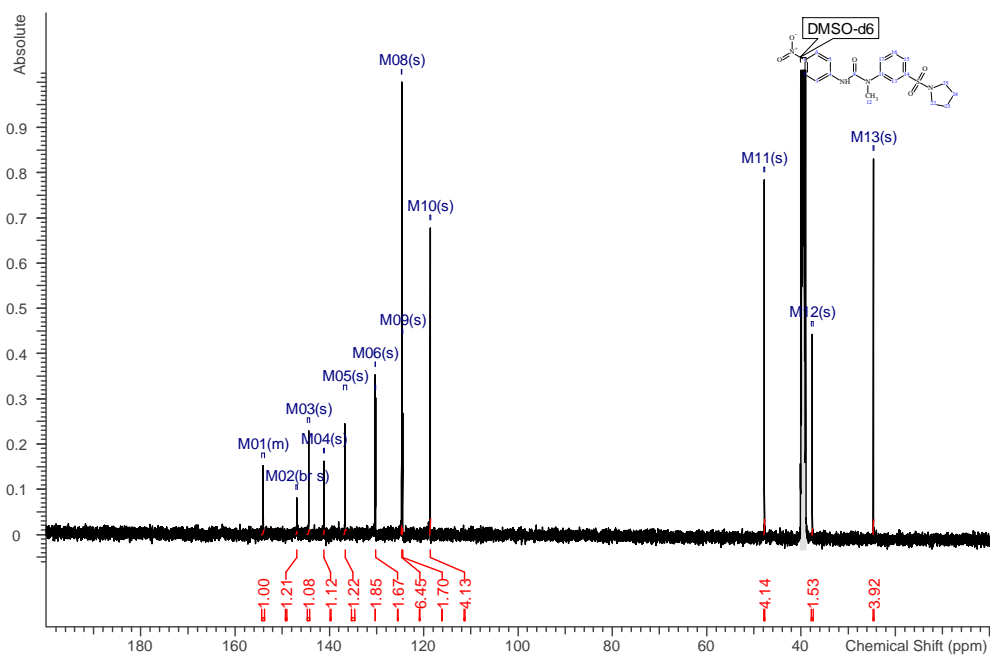

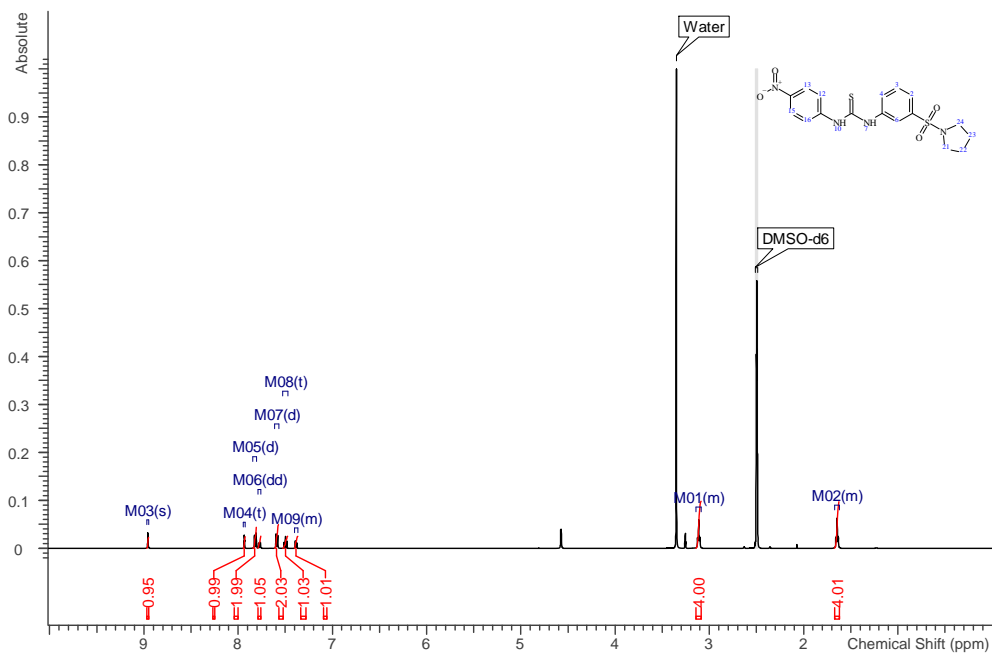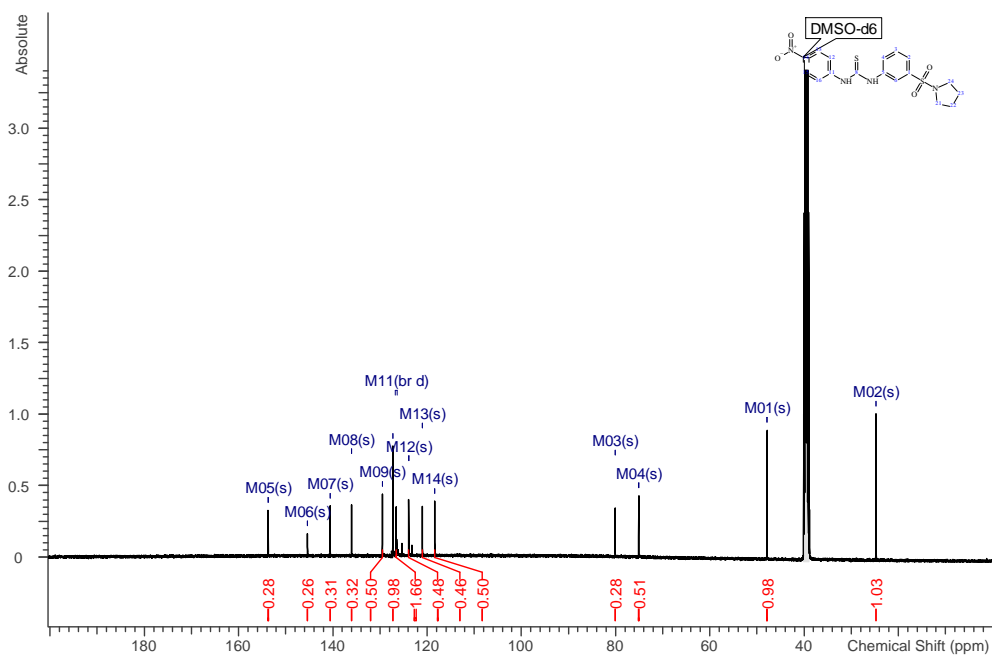

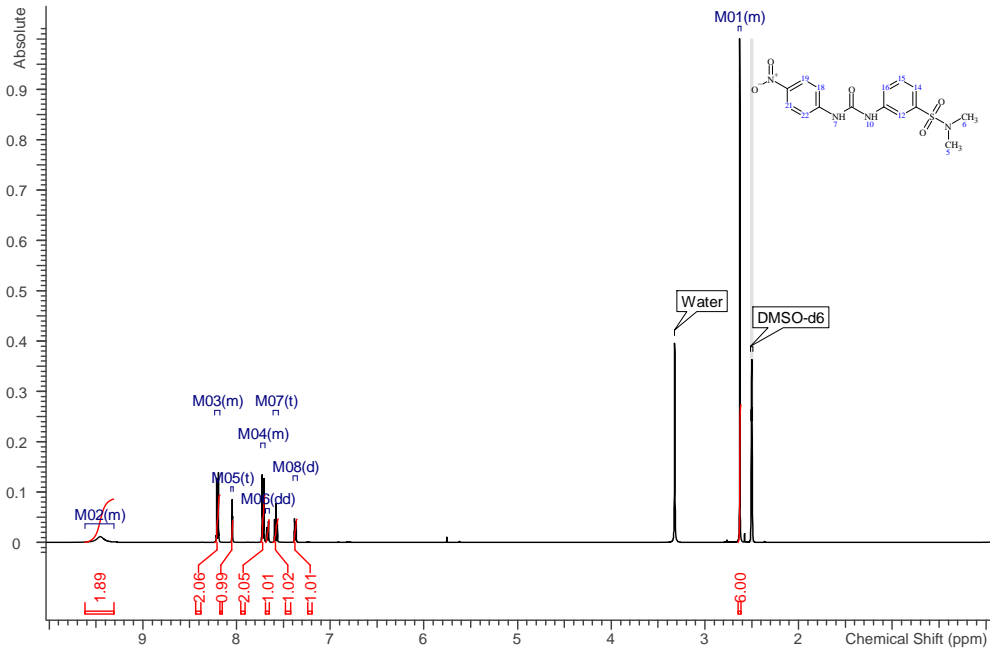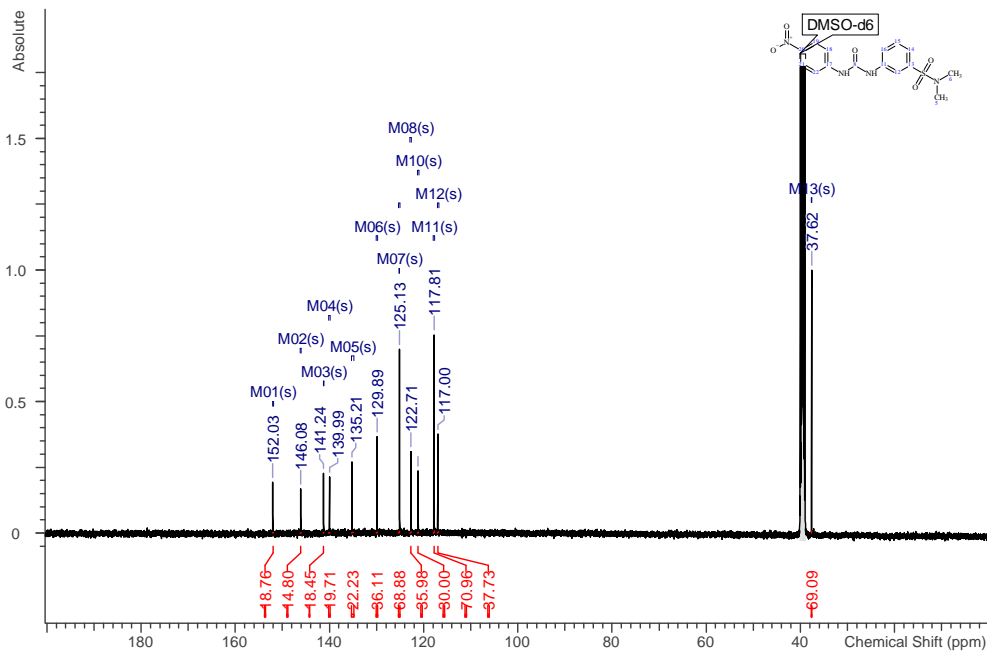

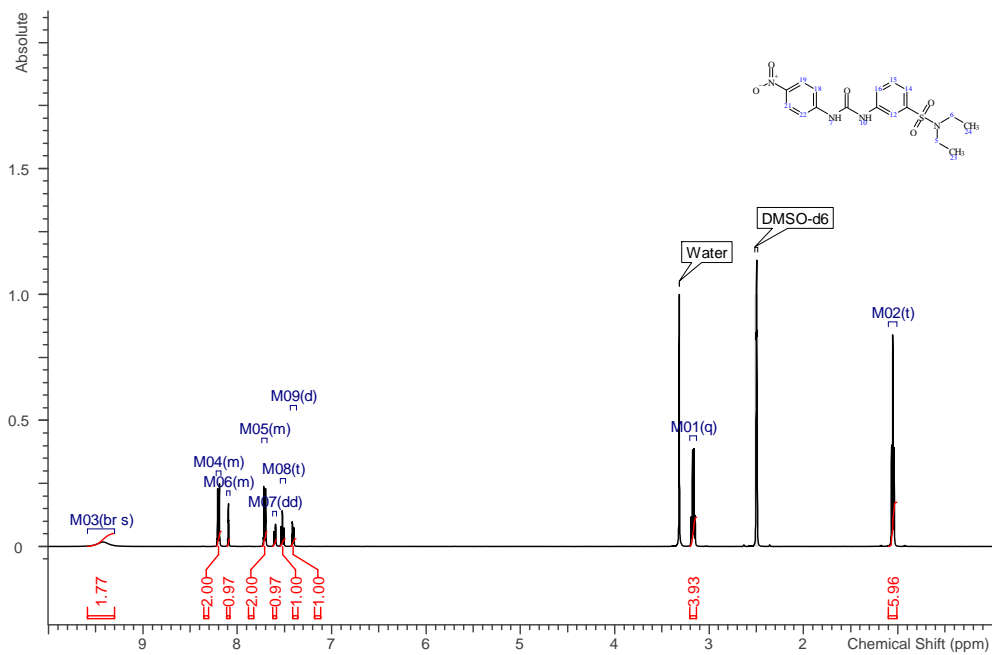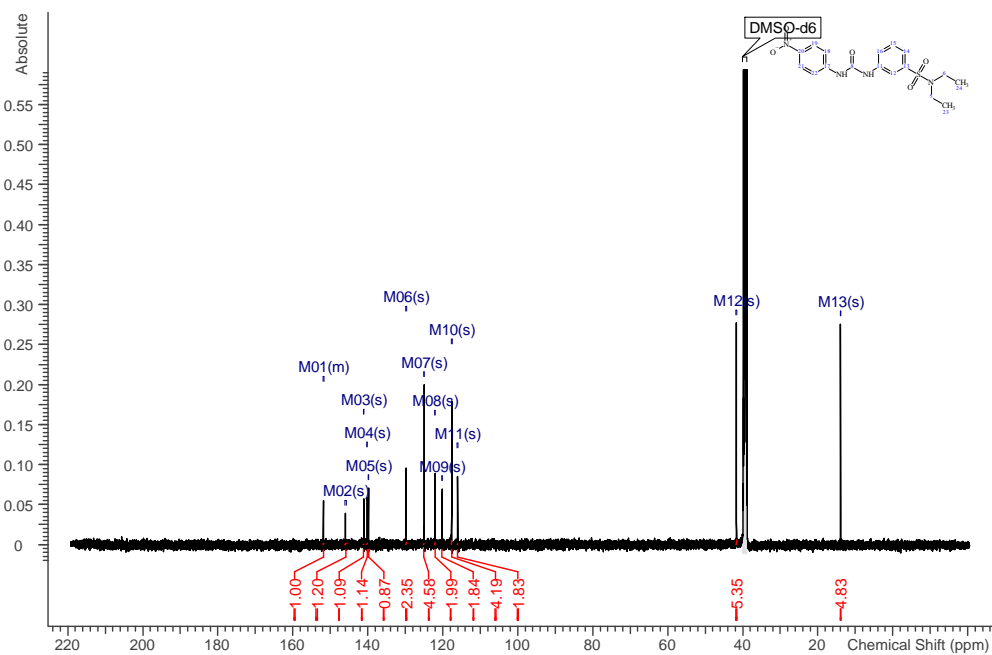

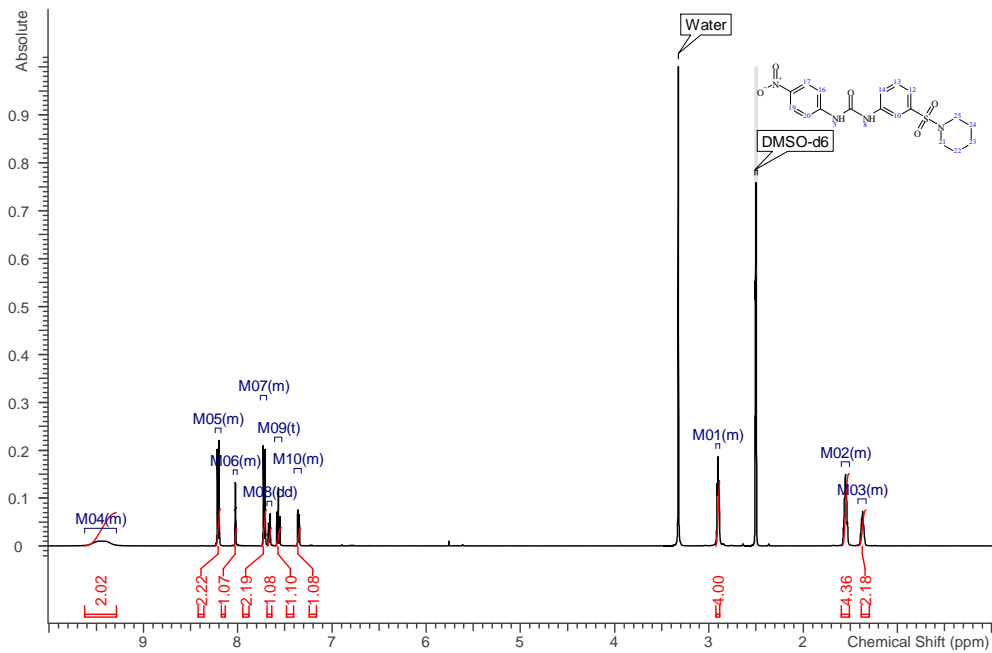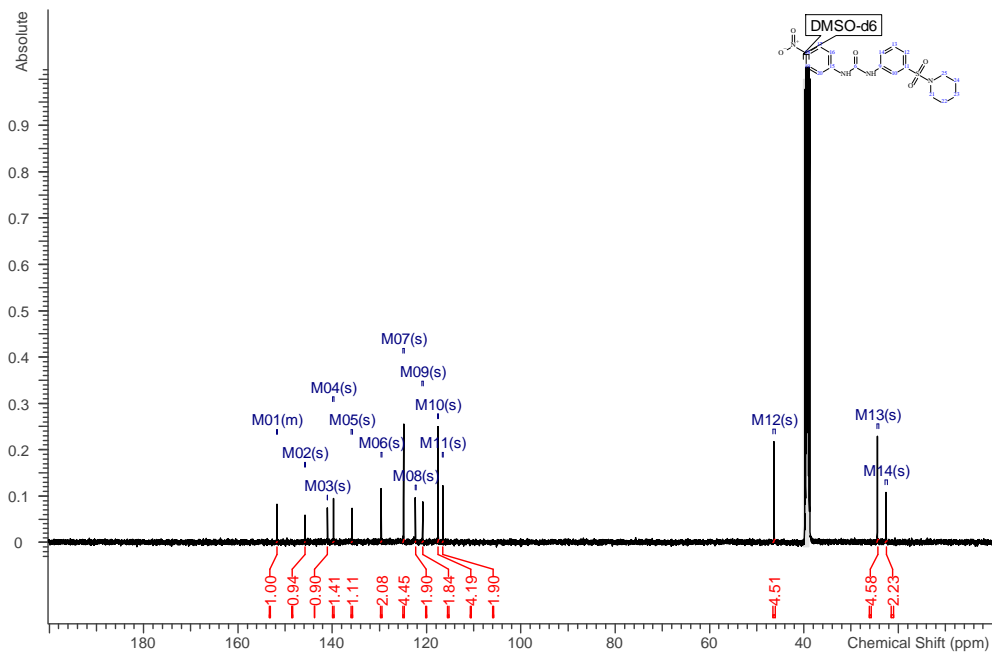

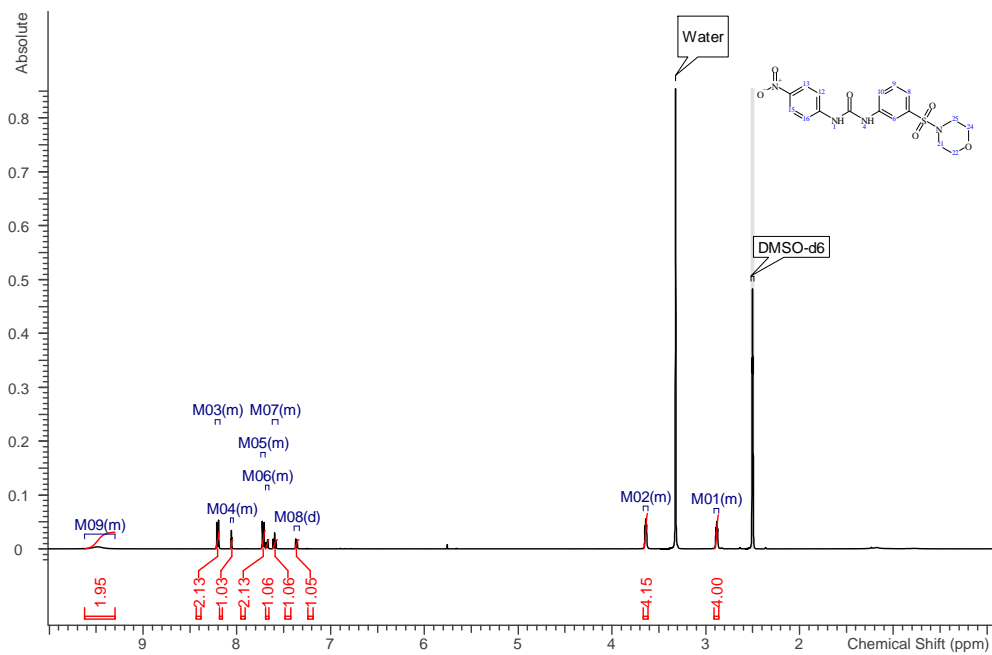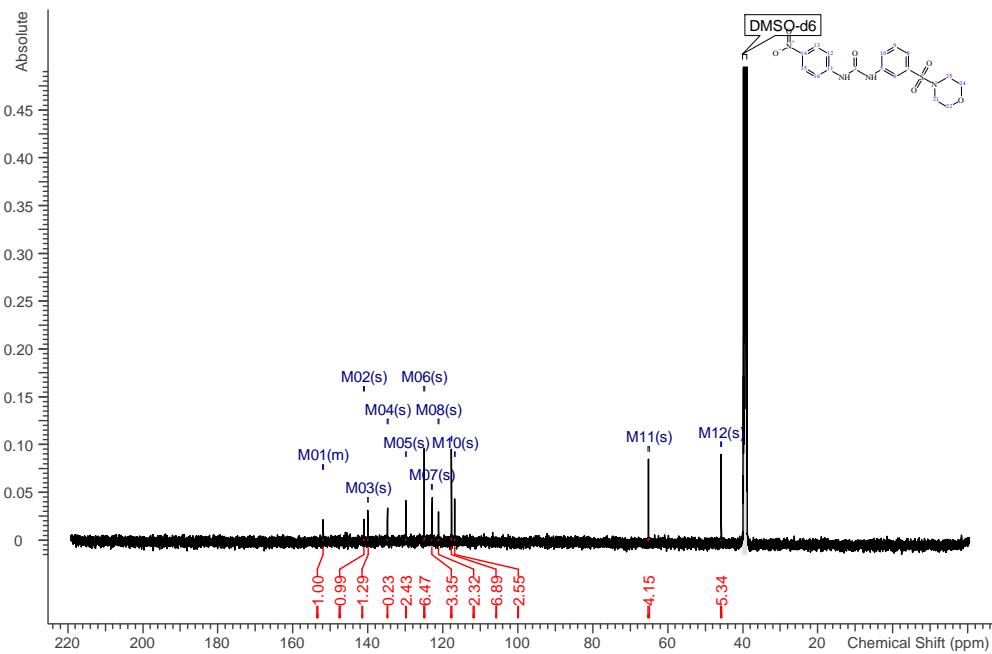



28

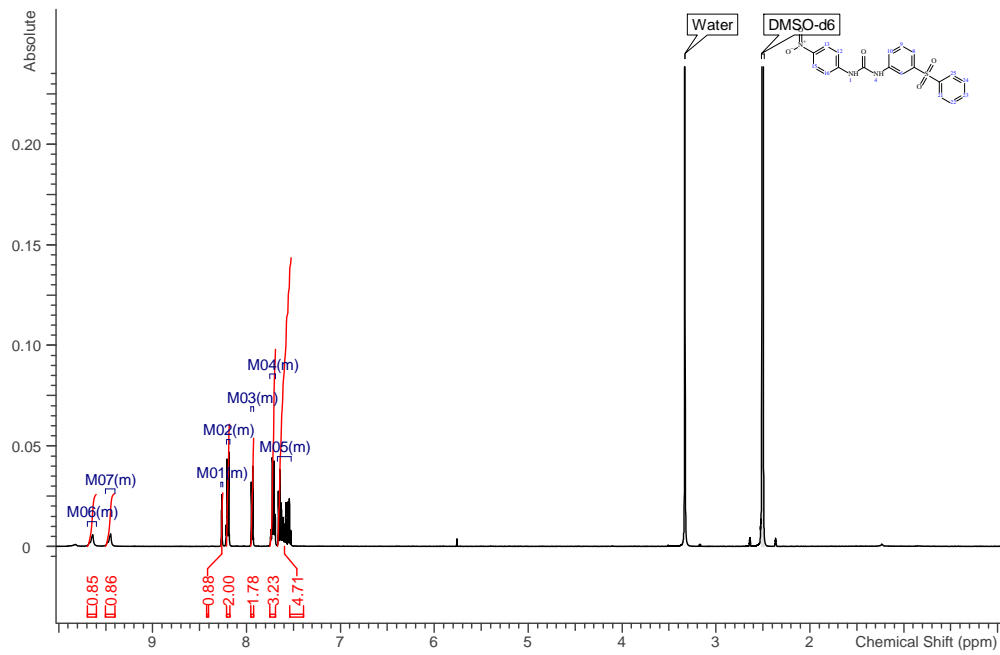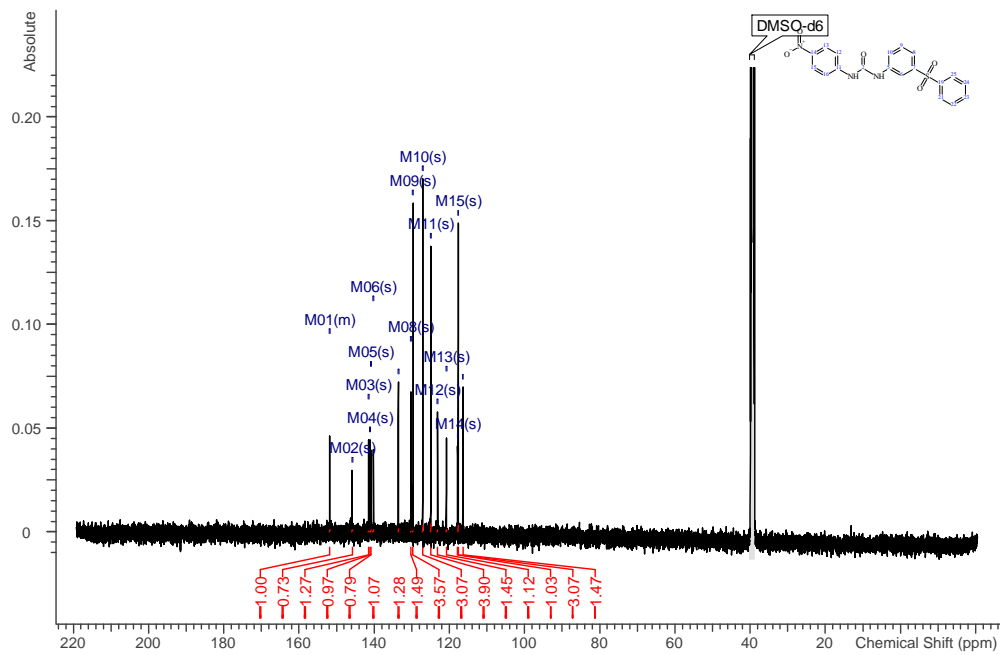

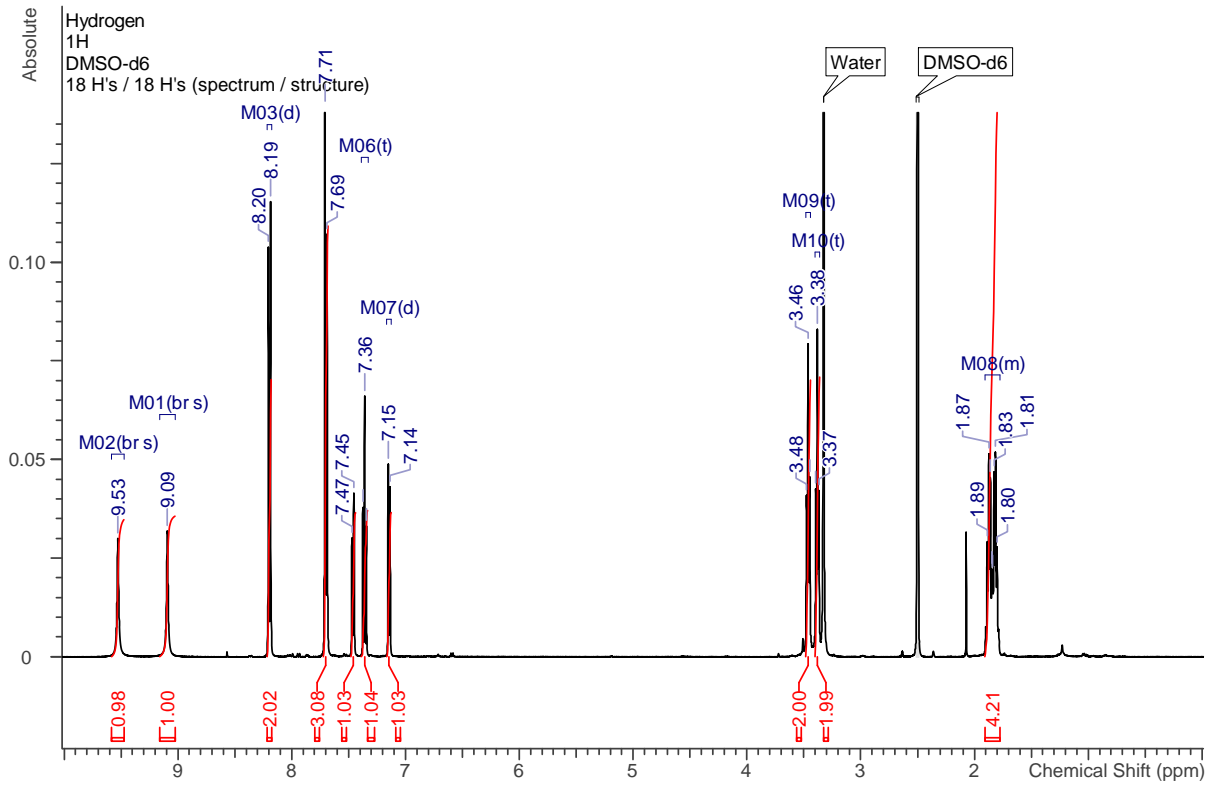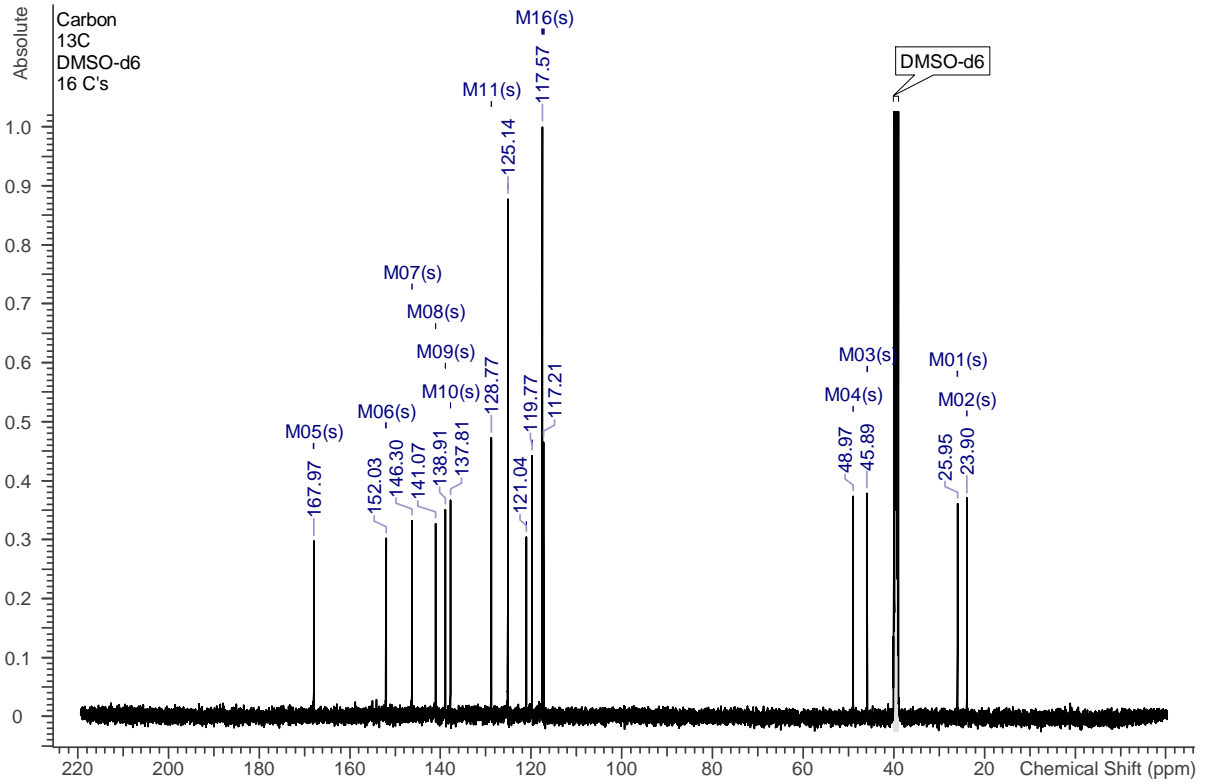

30

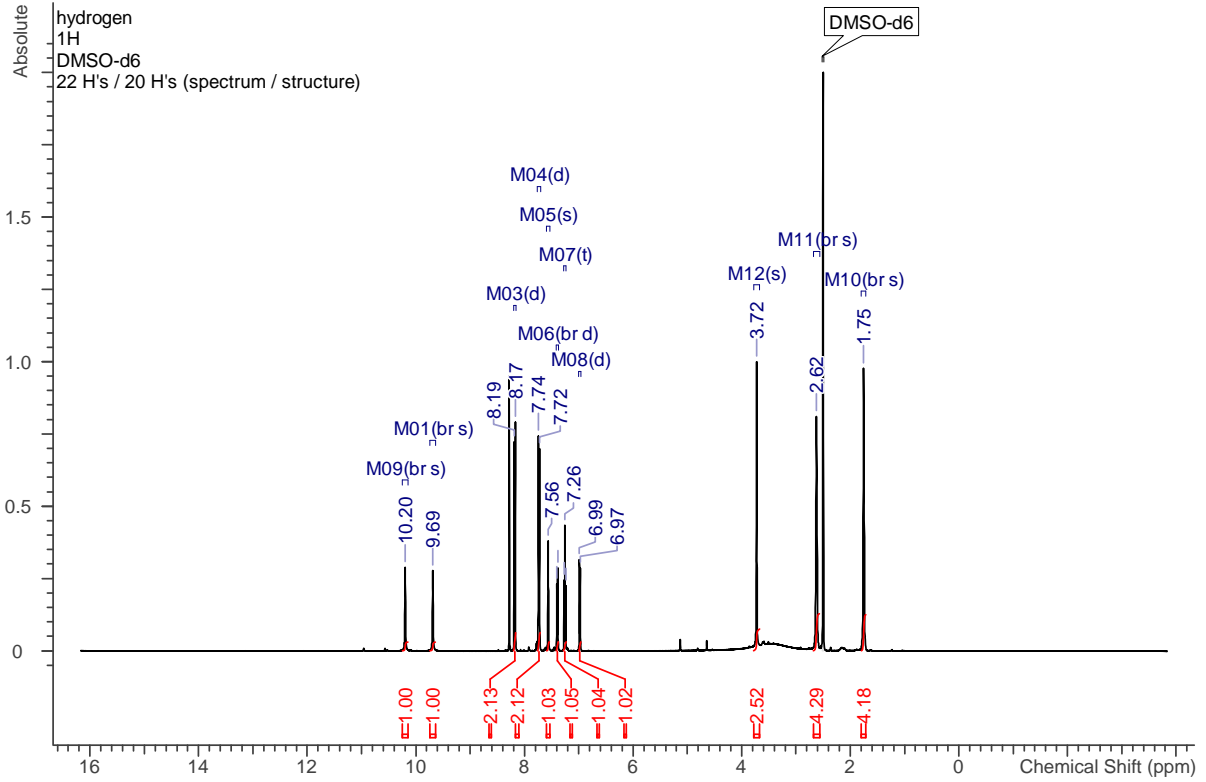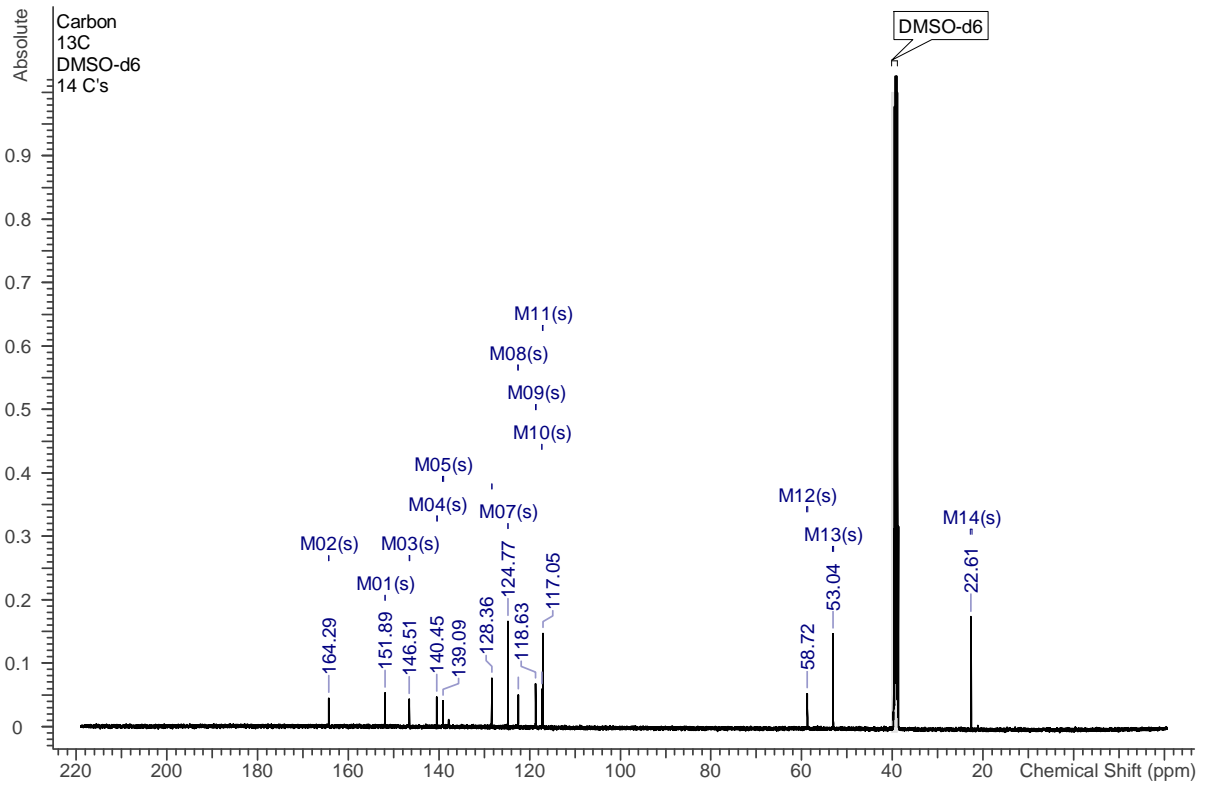

31

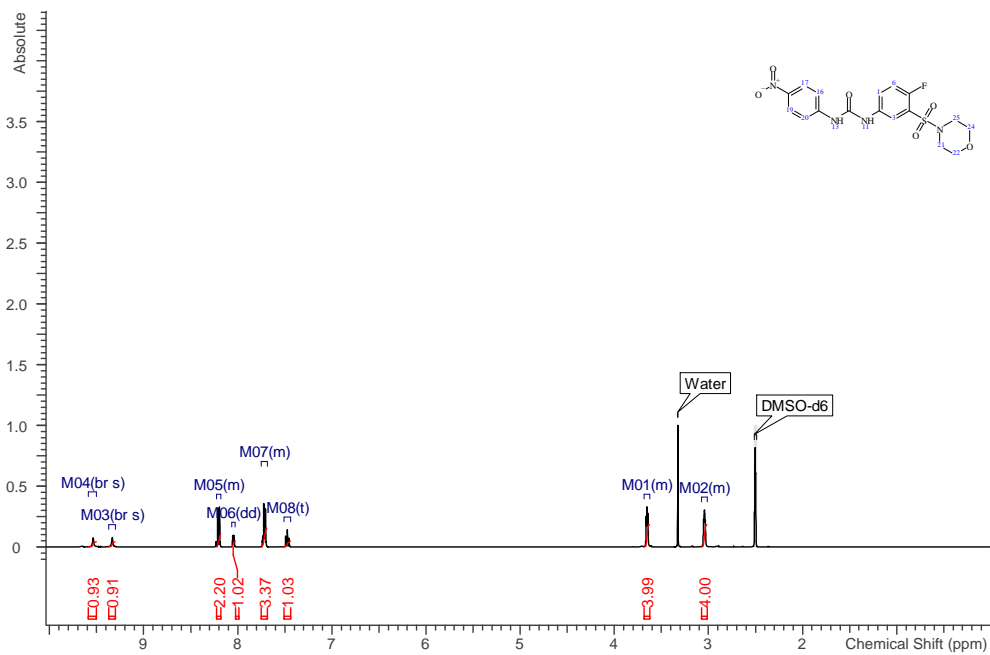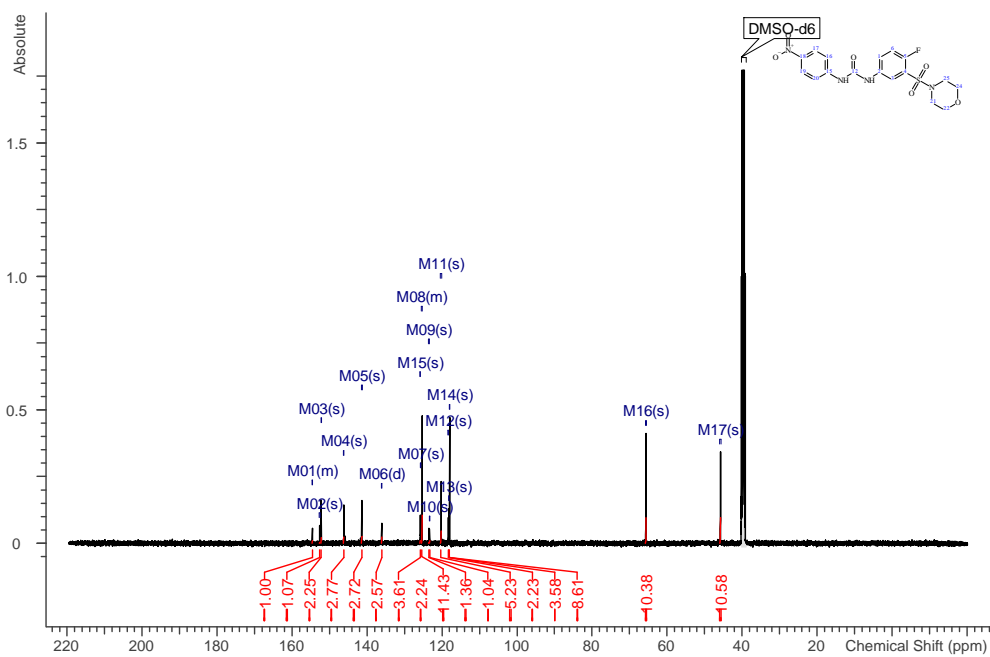

32

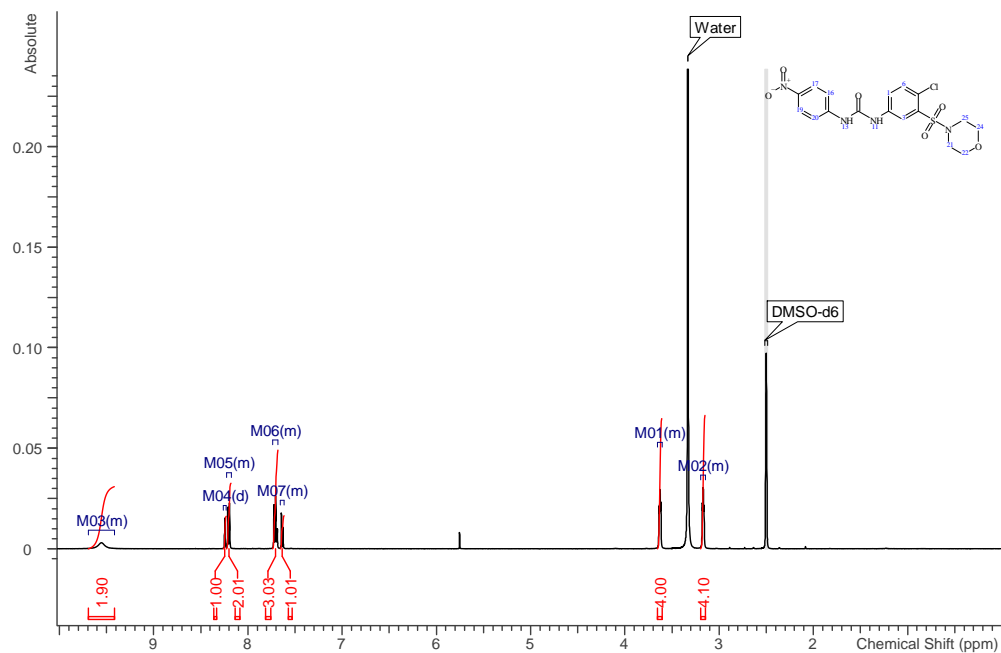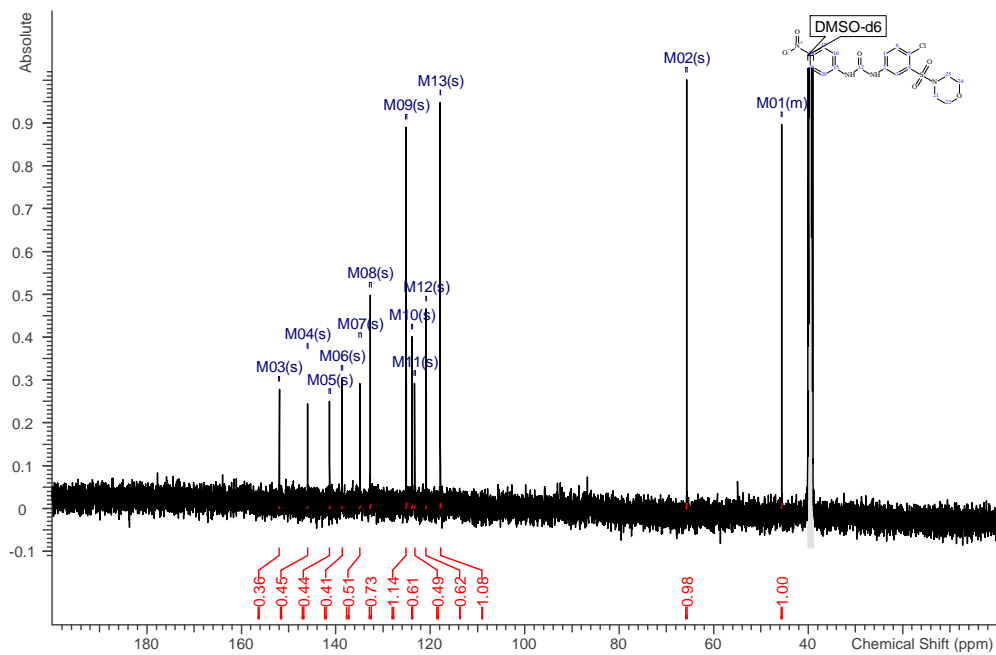

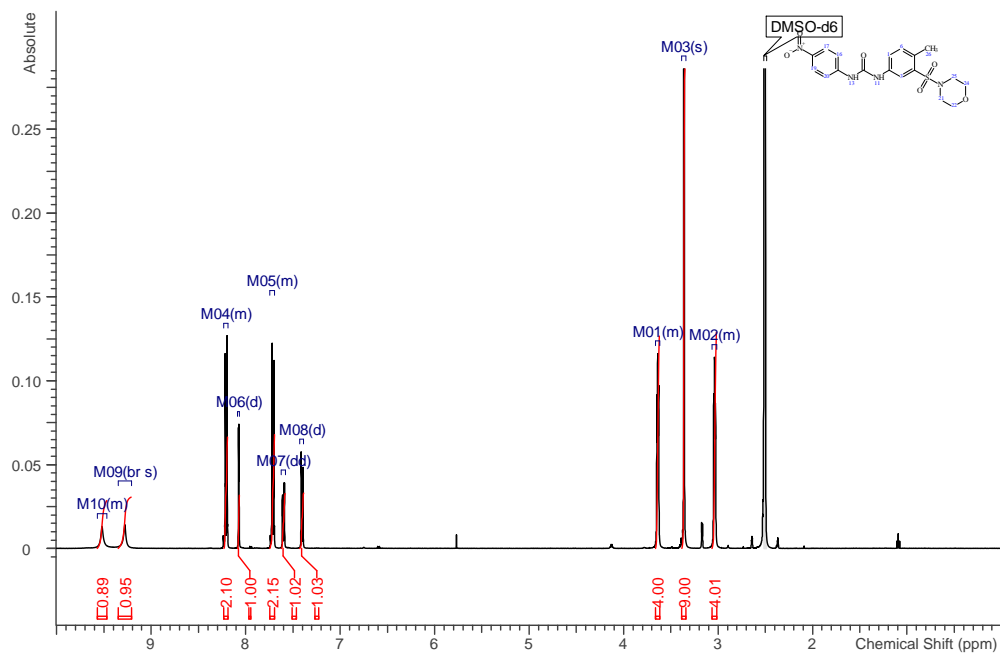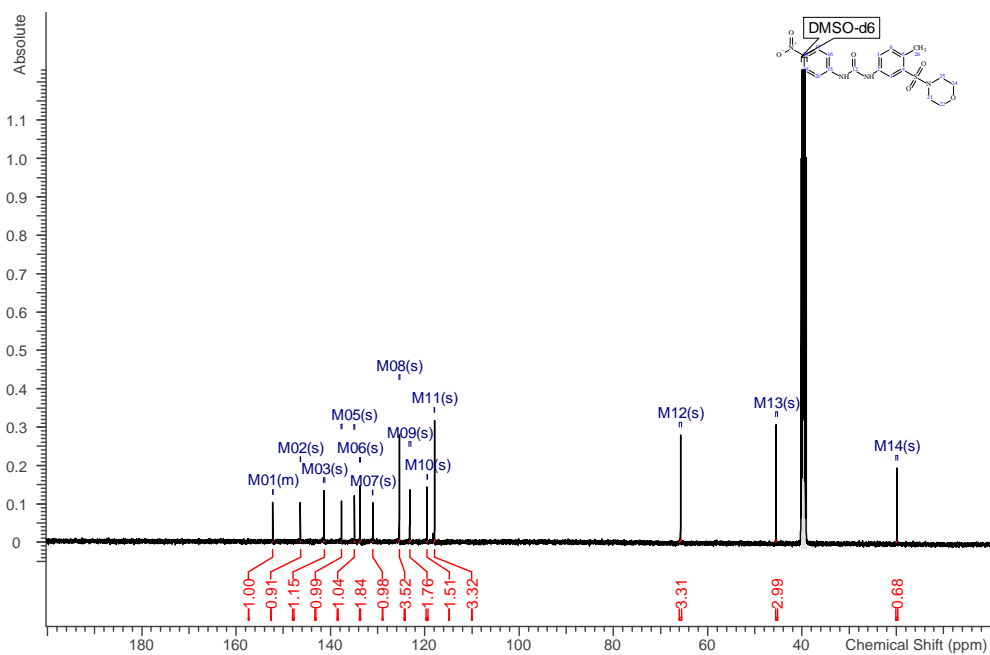

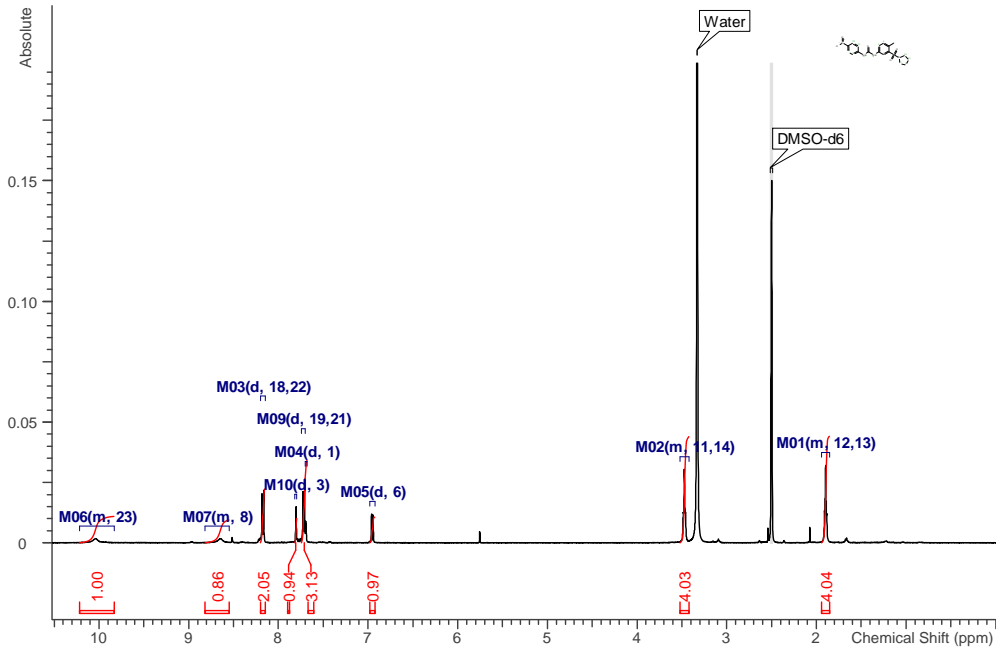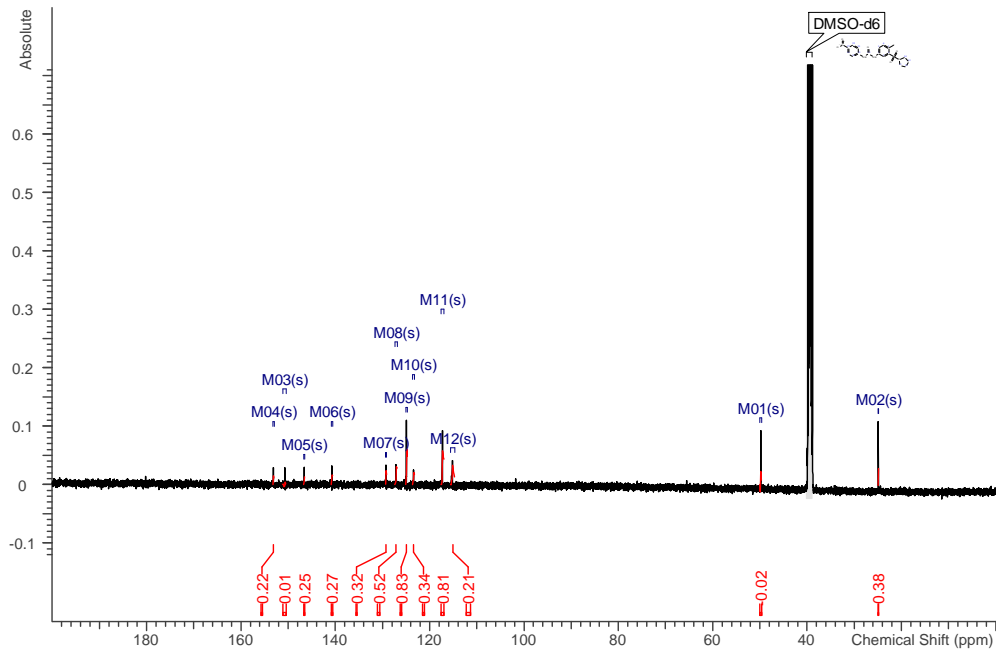

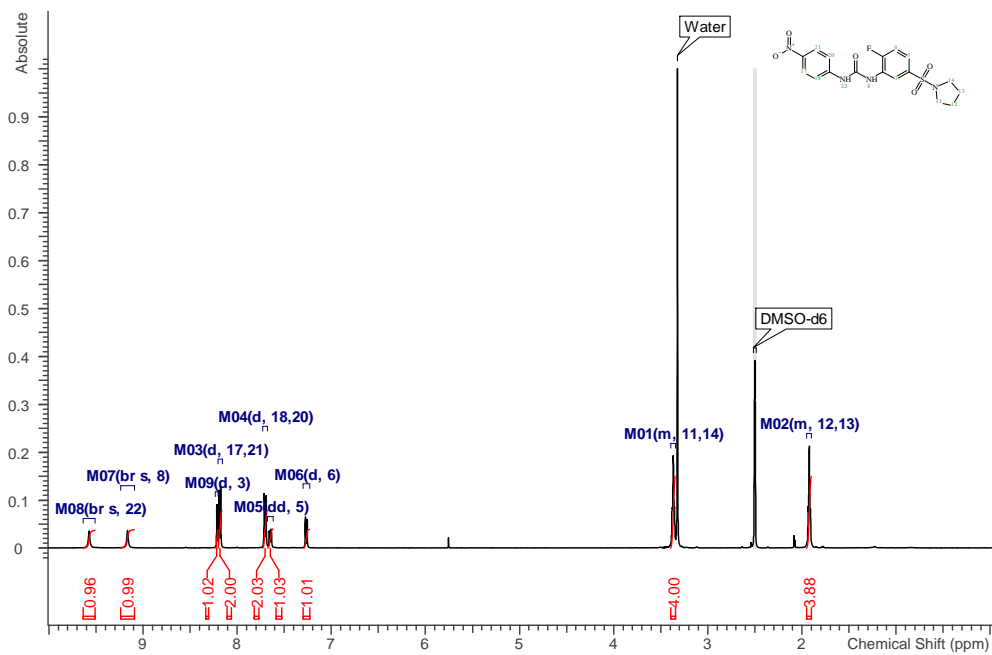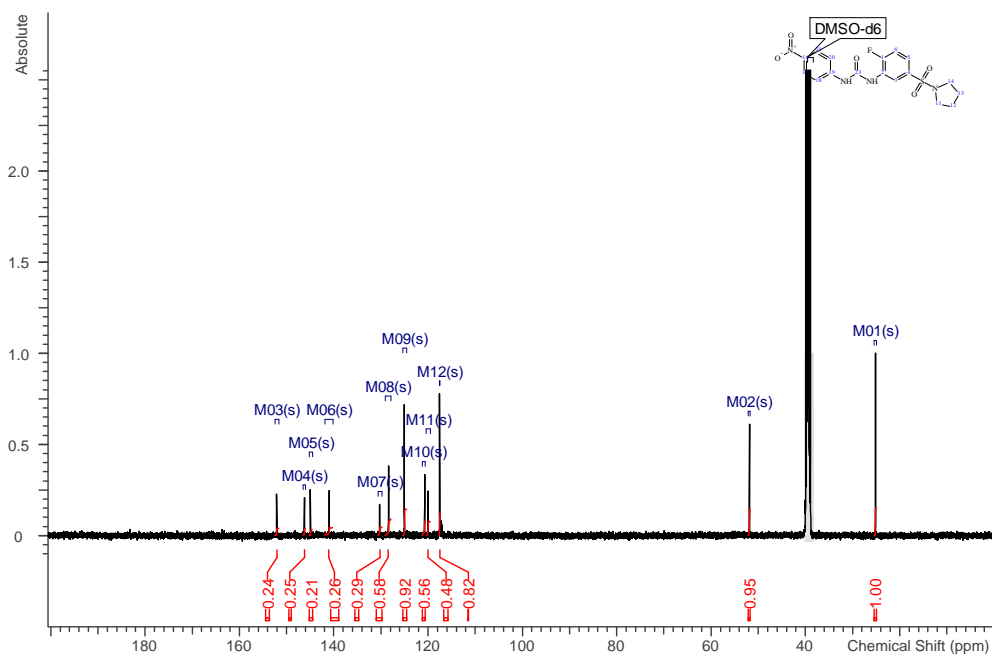



36

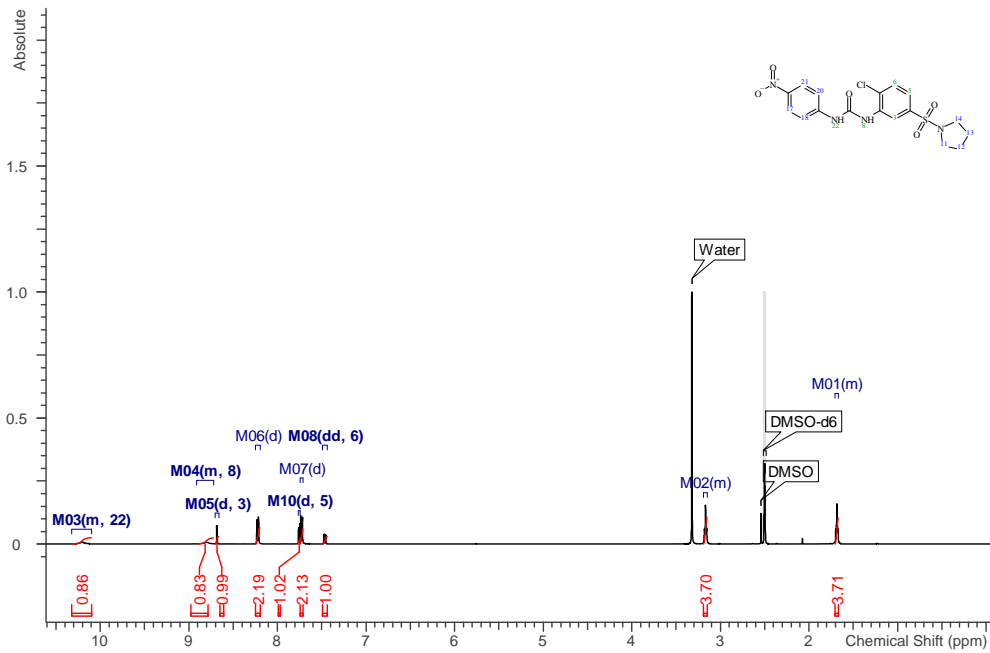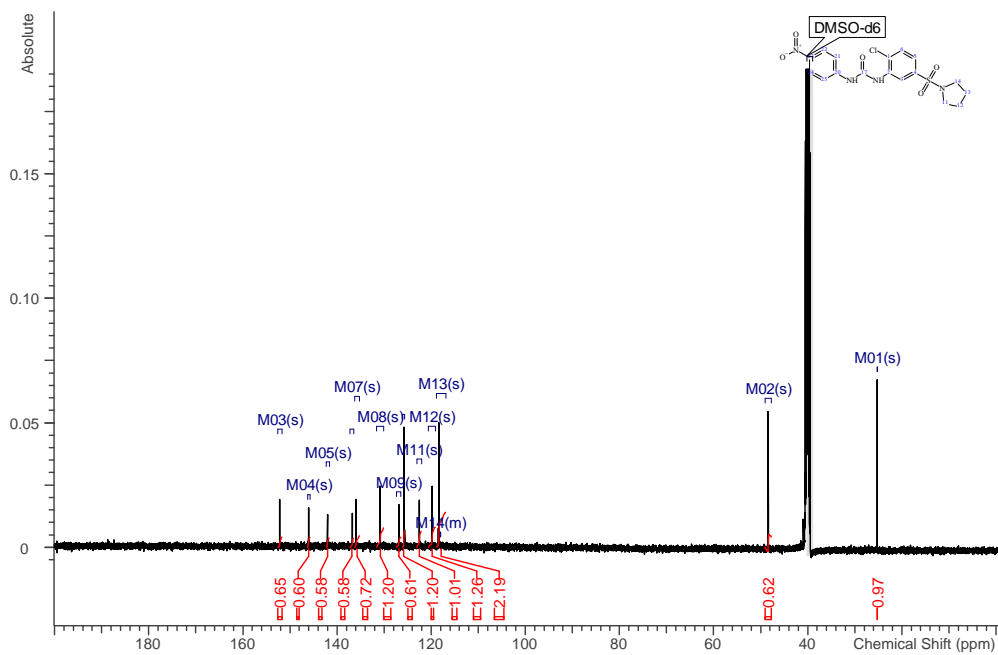

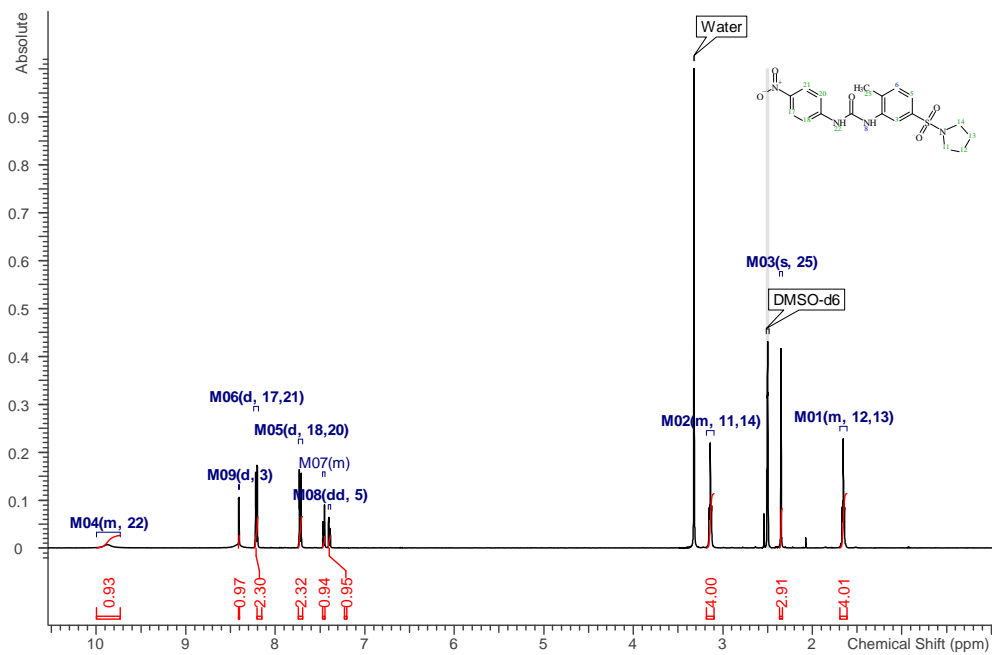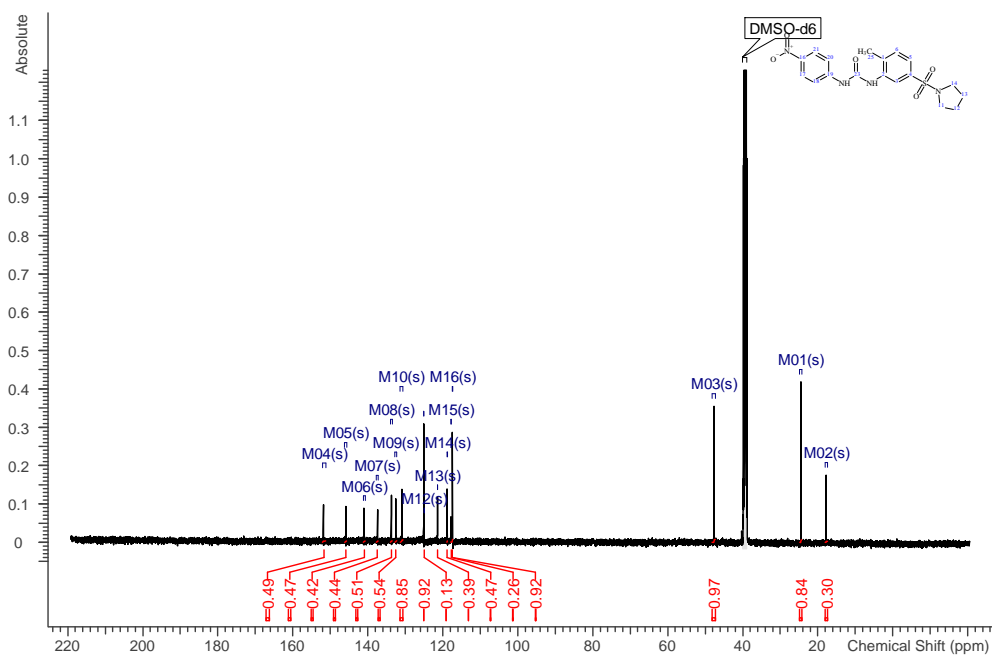

38

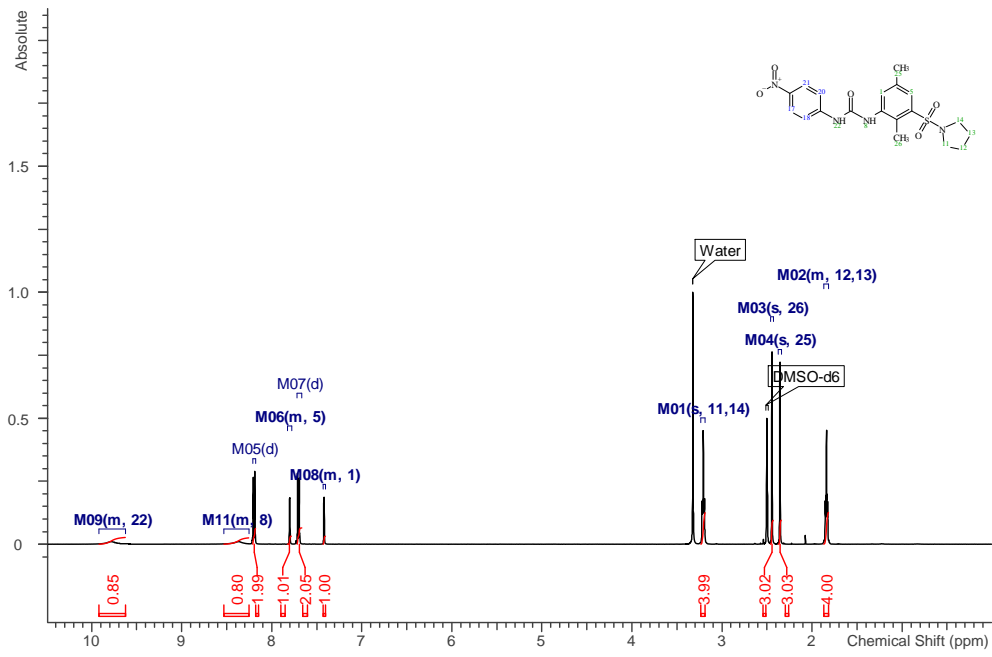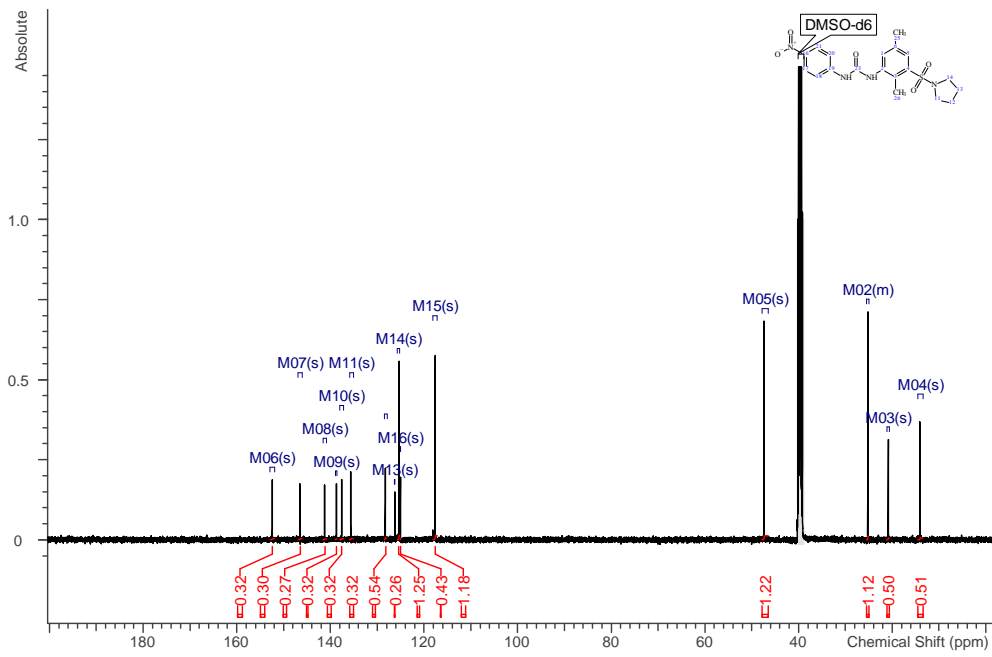

39

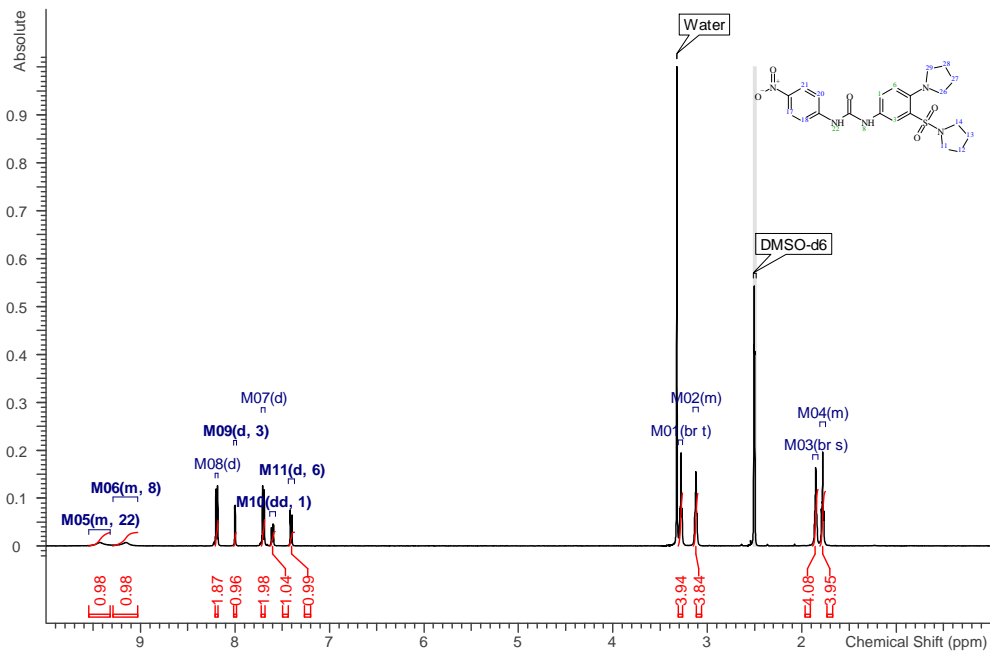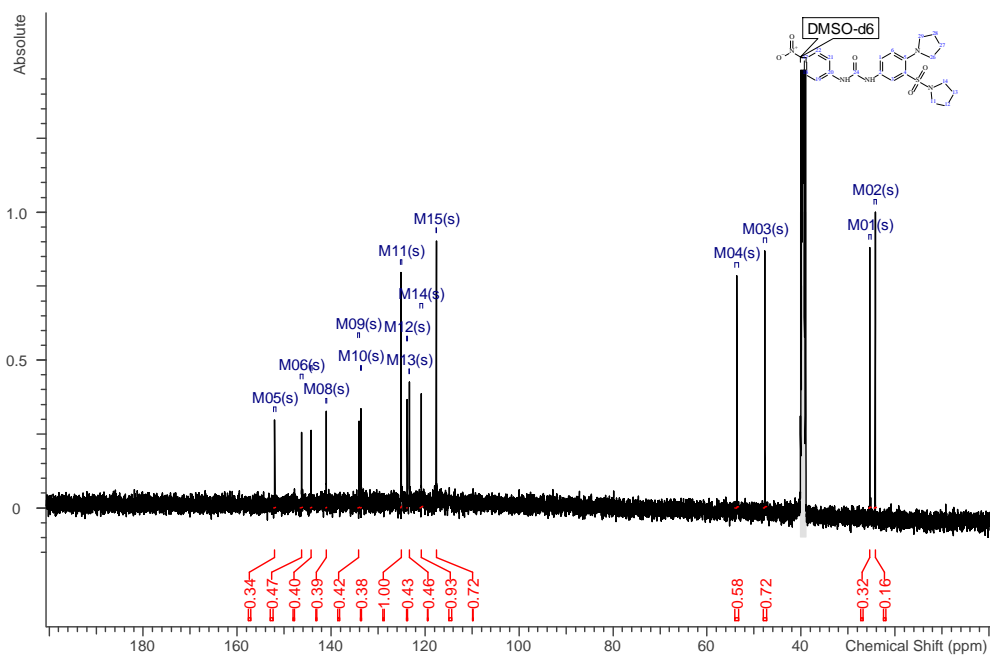

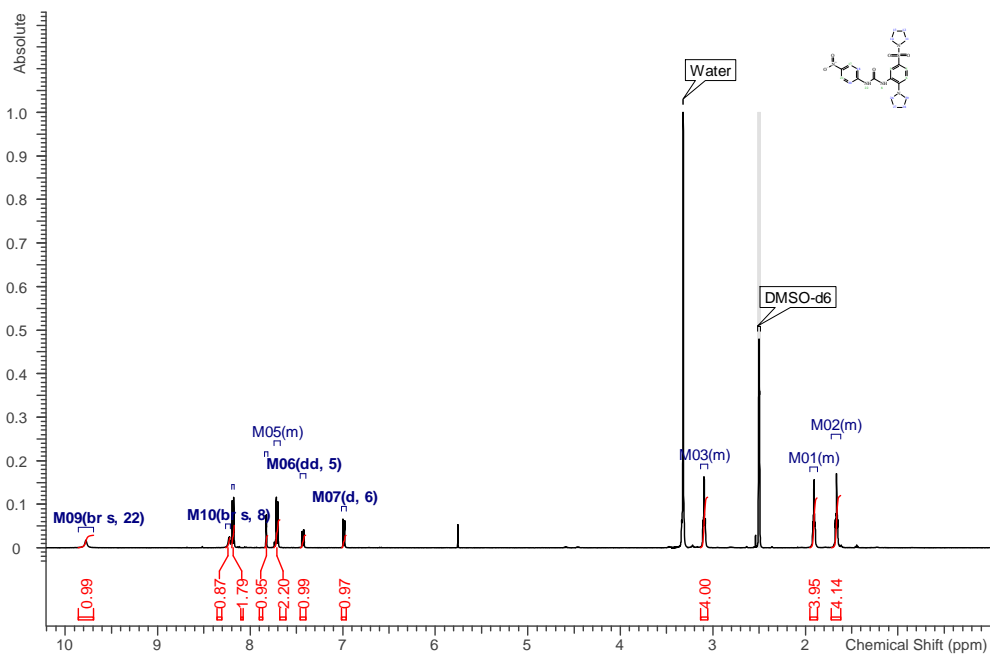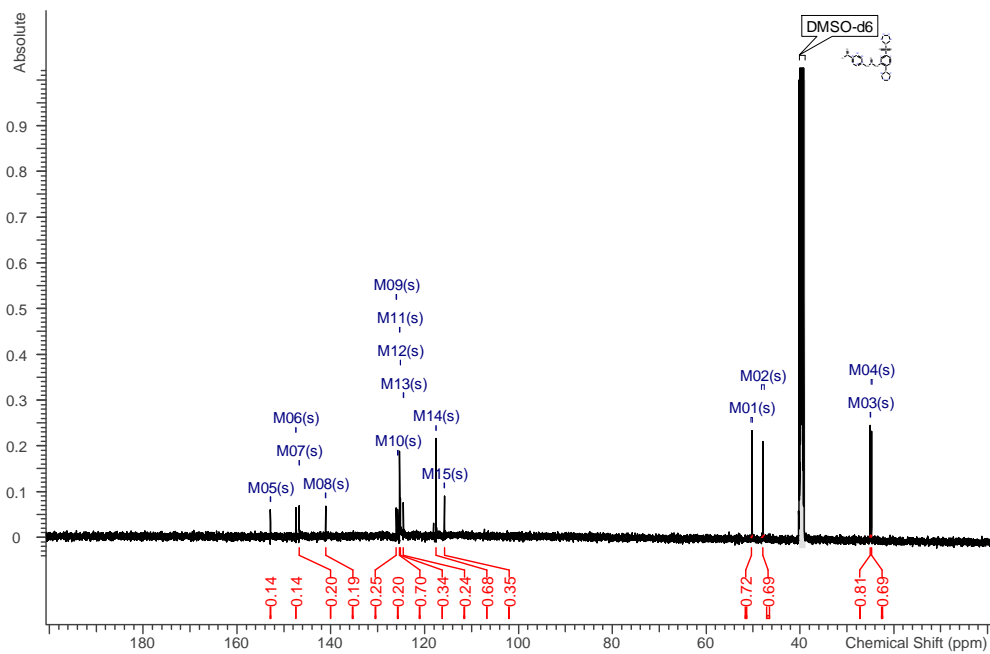

4

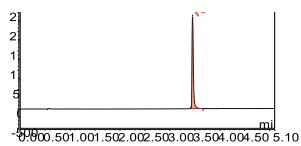

5

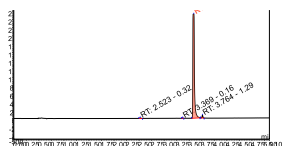

6

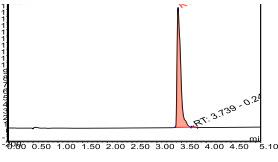

7

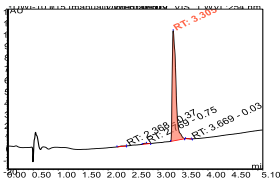

8

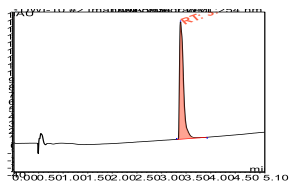

9

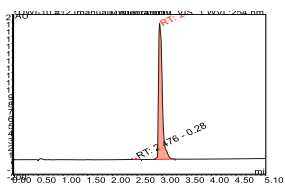



10

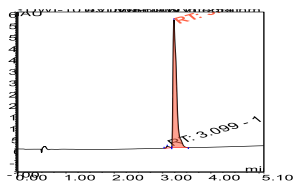

11

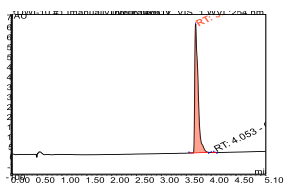

12

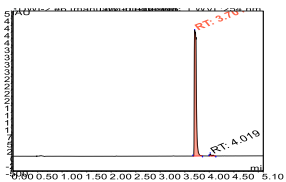

13

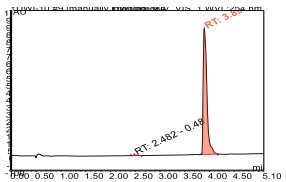

14

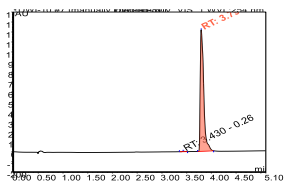

15

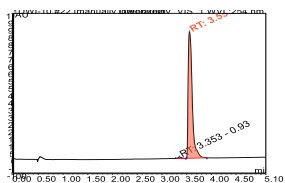

16

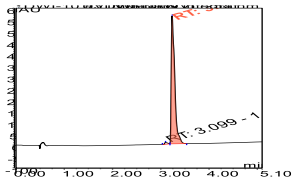

17

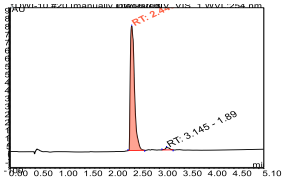

18

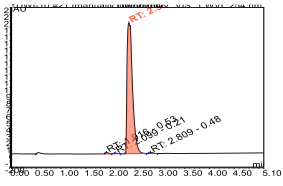

20

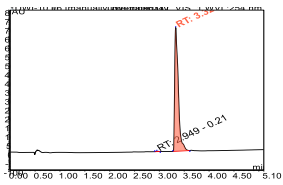

21

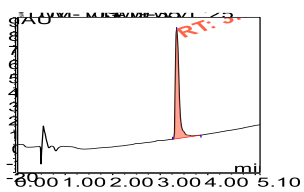

23

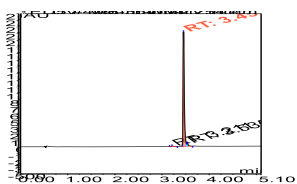

24

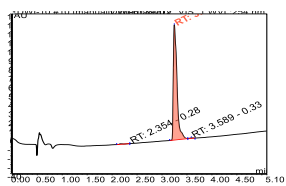

25

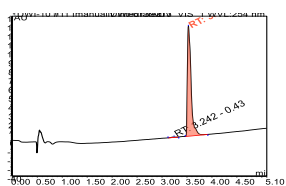

26

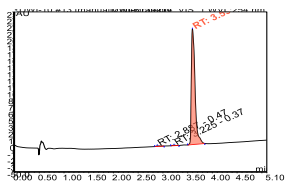

27

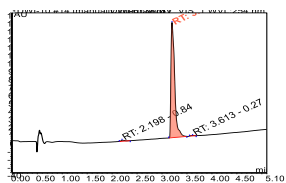



28

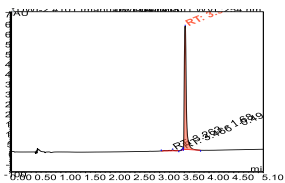

29

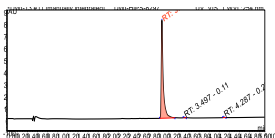

30

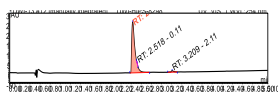

31

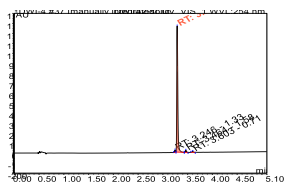

32

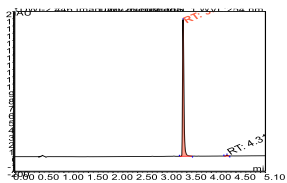

33

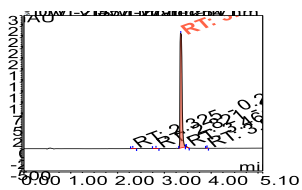

34

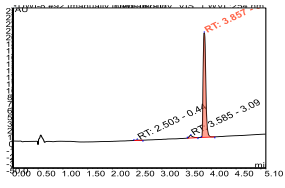

35

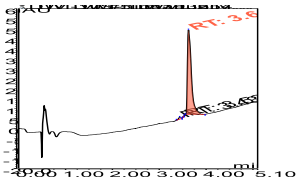

36

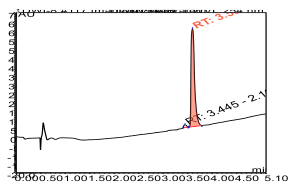

37

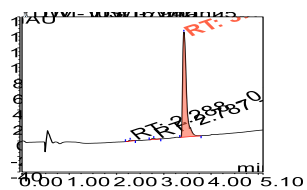

38

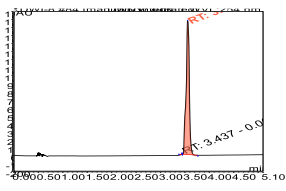

39

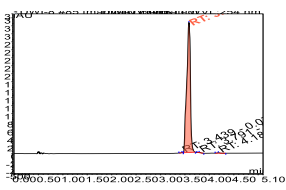

40

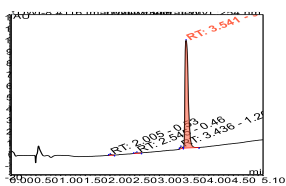

Supplement: jm4c00212_si_001.pdf [file jm4c00212_si_001.pdf]
